# Supplementary material for: An efficient proline-based homogeneous organocatalyst with recyclability
Source: Royal Society of Chemistry journal article supplement (doi:10.1039/c7nj03912c), 2017-12-13

## Figures

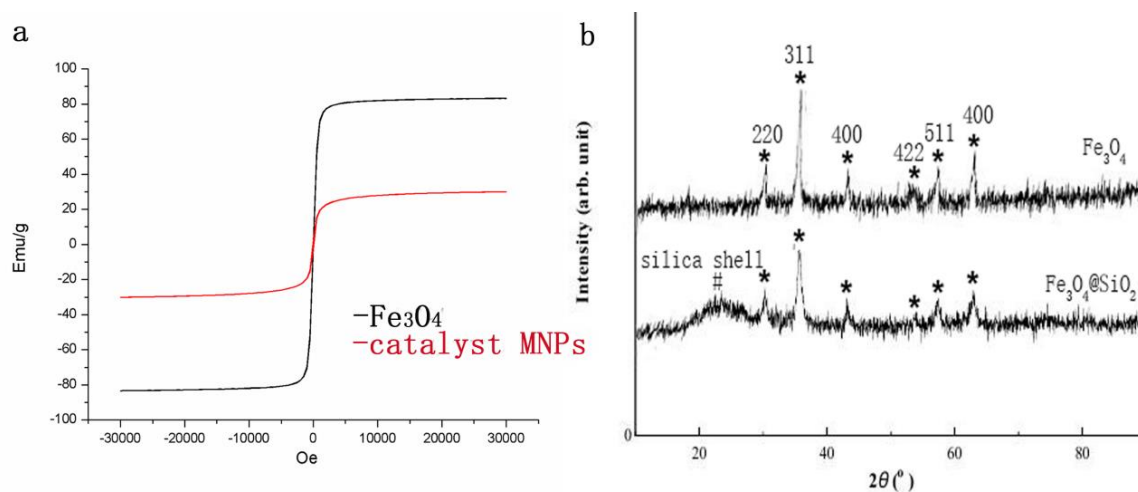

Figure. S1. The magnetic hysteresis loops (a) and XRD of  $\text{Fe}_3\text{O}_4$  MNPs and  $\text{Fe}_3\text{O}_4@\text{SiO}_2$  MNPs(b).

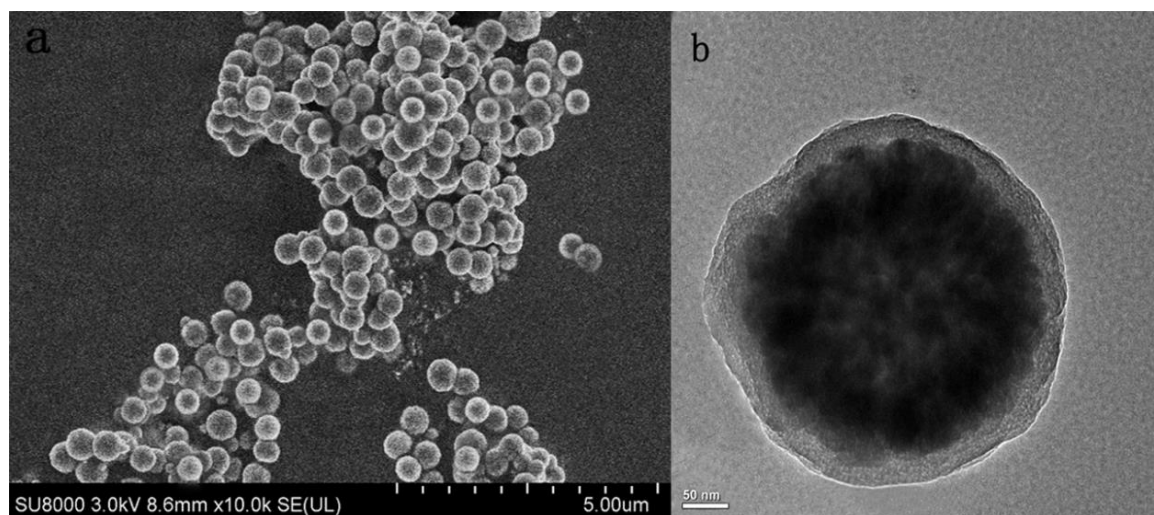

Figure. S2. The SEM (a) and TEM (b) images of catalyst nanoparticles

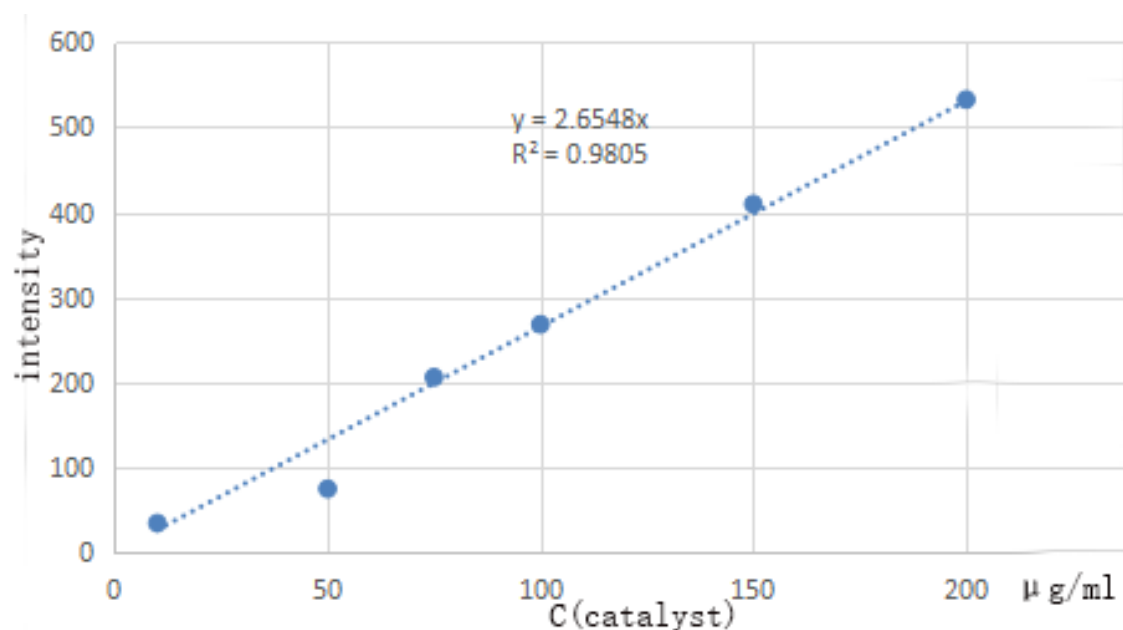

Figure. S3. The quantity measurement of catalyst **a** by RP-HPLC(C18 reverse phase column; grain size:  $5\mu\text{m}$ ; length $\times$ diameter=250 $\times$ 4.6ml; mobile phase: methanol; pressure: 77bar; quantity of flow: 1ml/min; retention time: 4.048min )

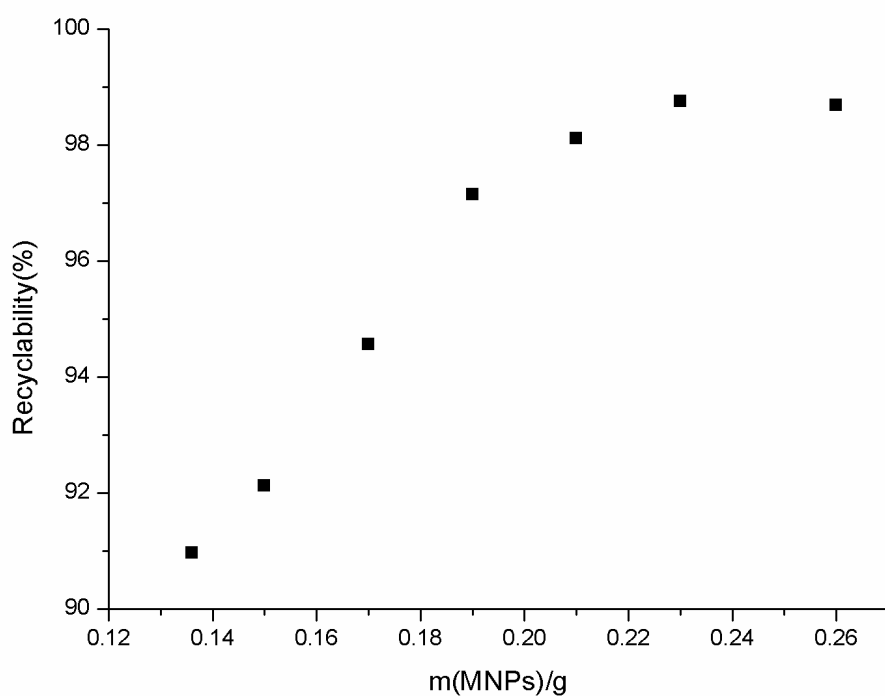

Figure. S4. The recyclability of 10.9mg catalyst **a** using different quantity of MNPs

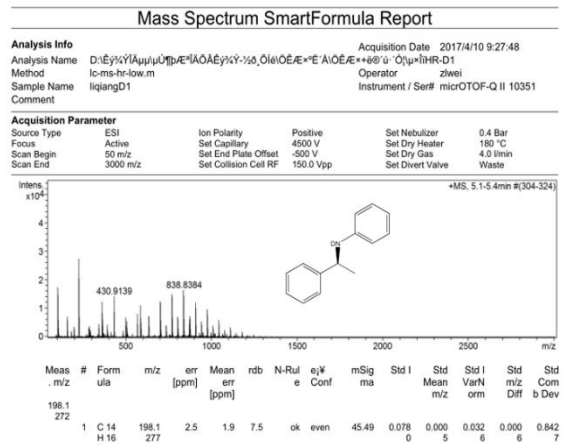

Figure. S5. HR Mass spectra of amine **[2a+H]<sup>+</sup>** and **[D-2a+H]<sup>+</sup>**.

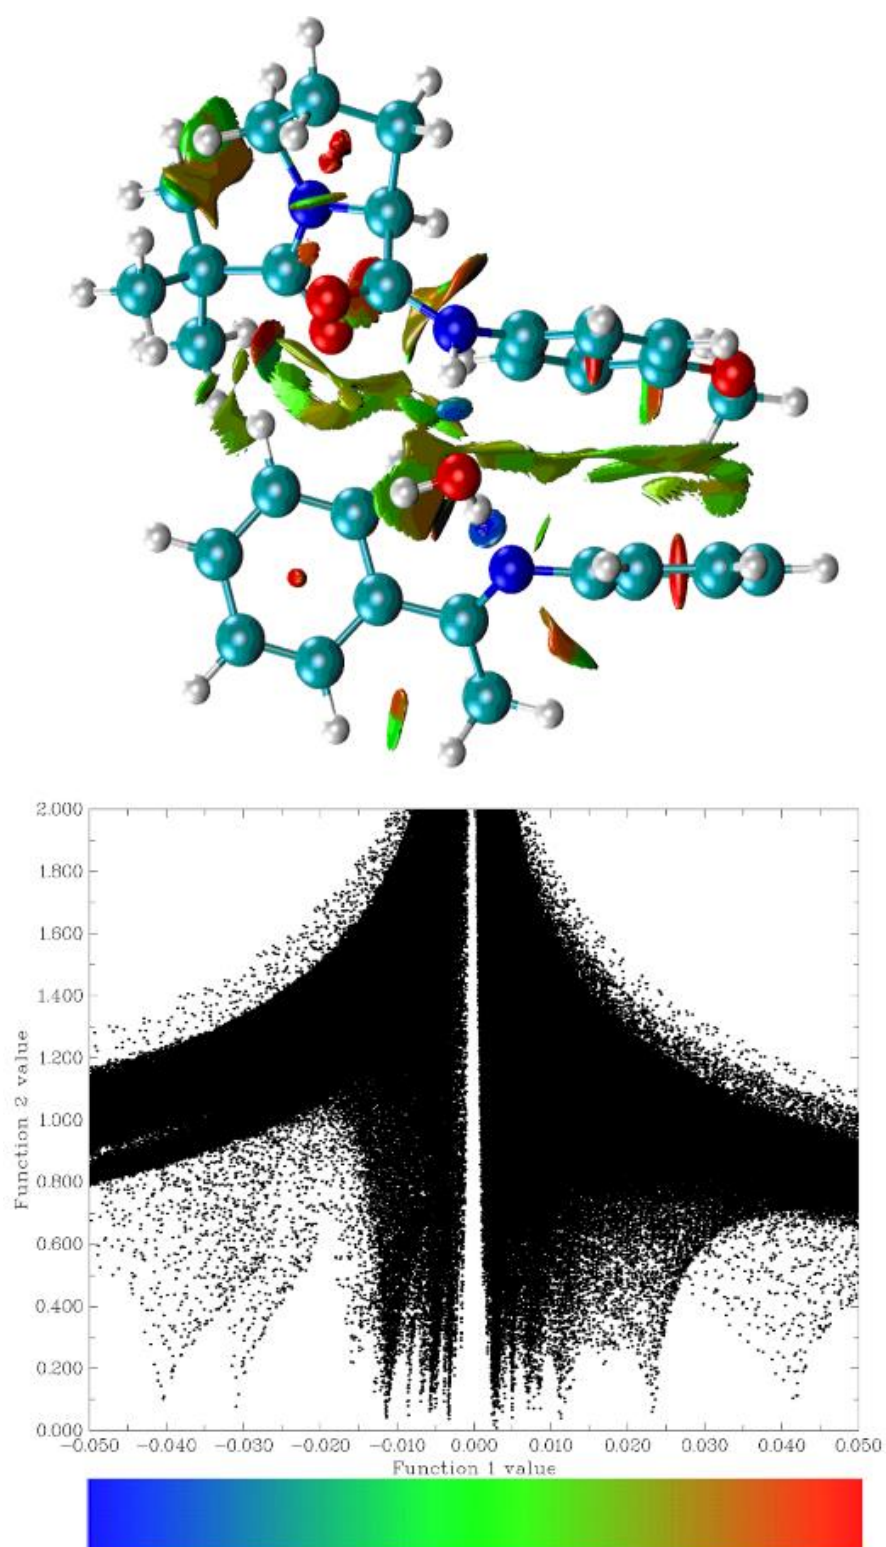

Figure. S6. Model A. the RDG analysis of A by Multiwfn and VMD.

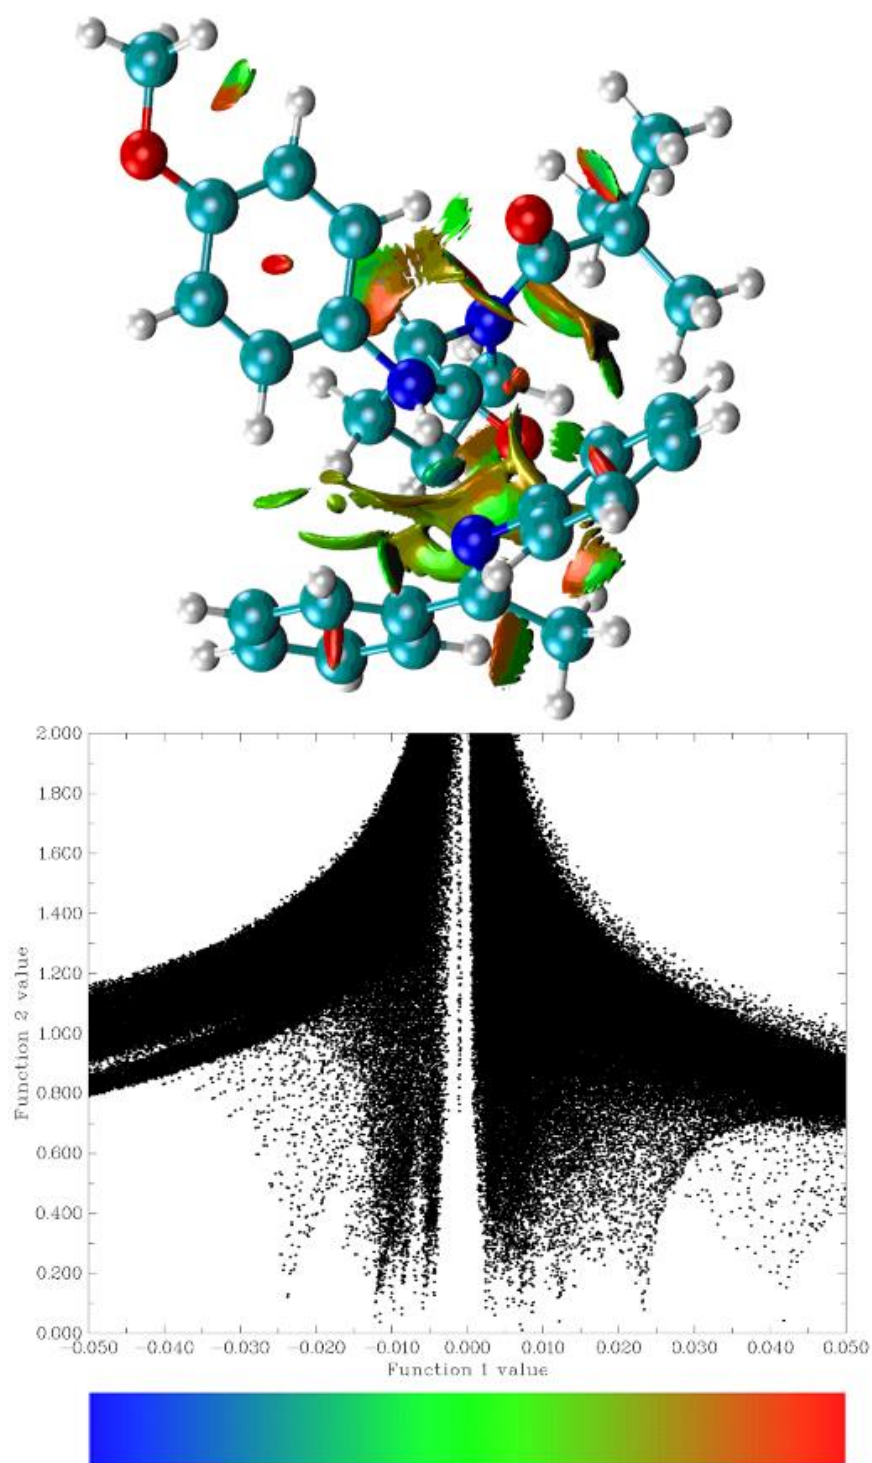

Figure. S7. Model B. the RDG analysis of B by Multiwfn and VMD.

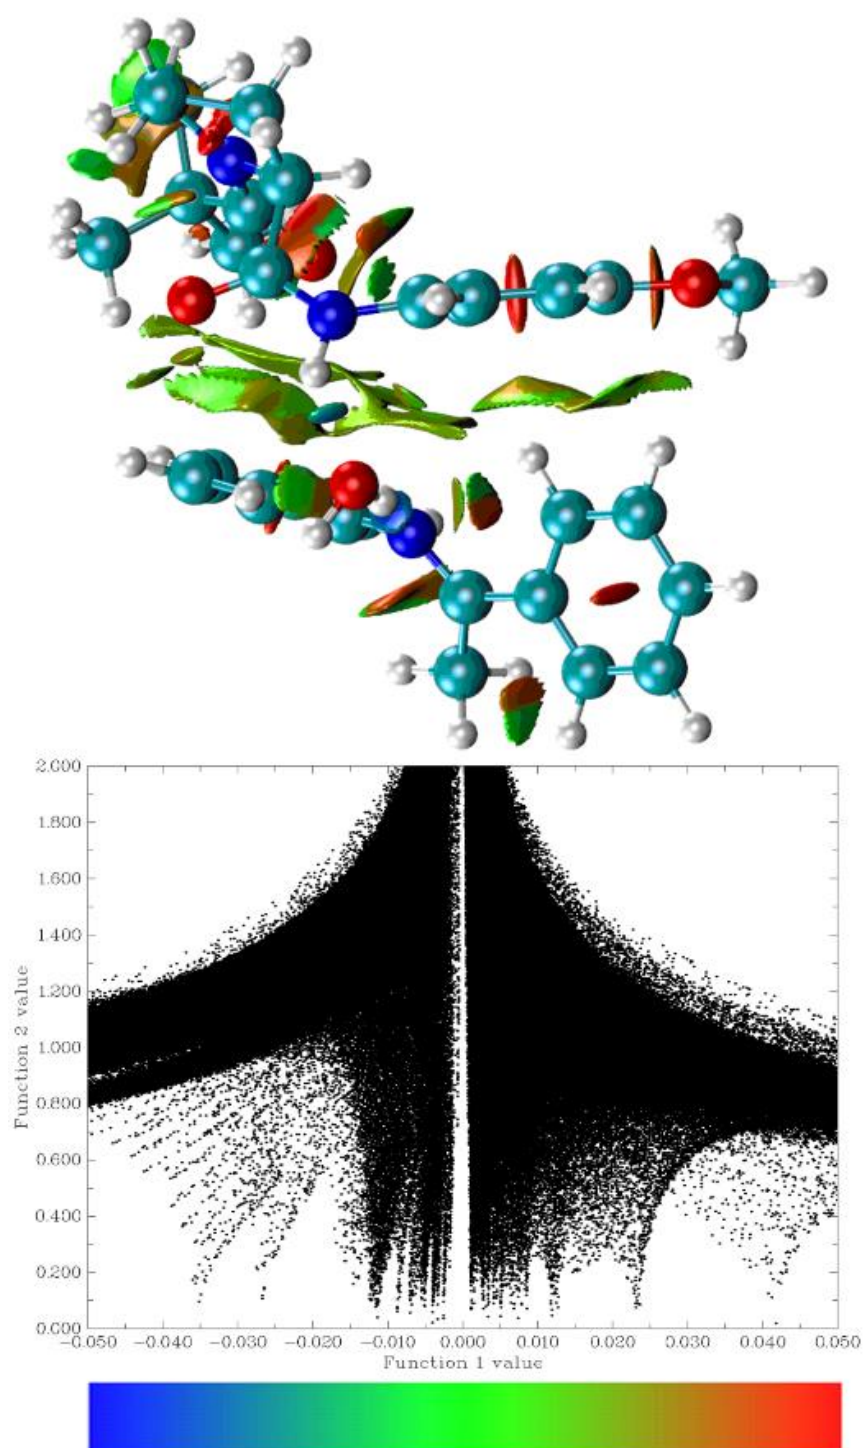

Figure. S8. Model C. the RDG analysis of C by Multiwfn and VMD.



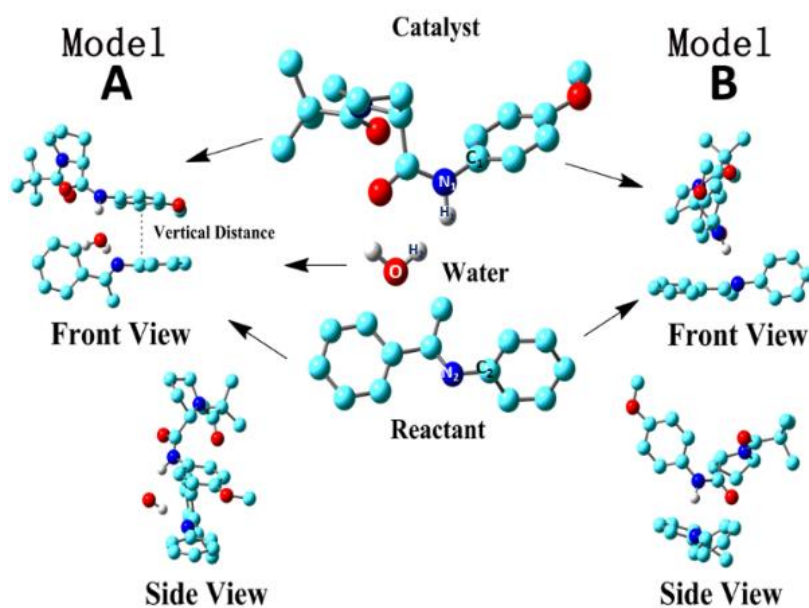

Figure. S9. The optimized geometries of catalyst, water, substrate, model A and B.

#### HRMS spectra

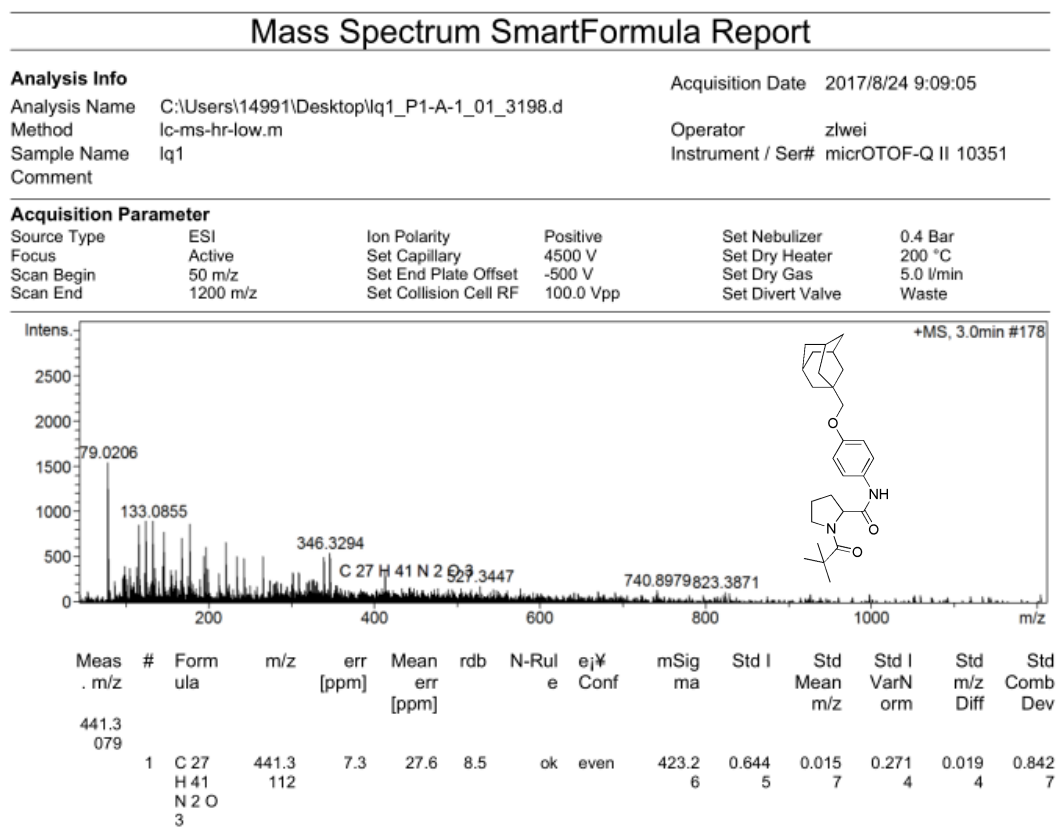

# Mass Spectrum SmartFormula Report

## Analysis Info

Analysis Name C:\Users\14991\Desktop\lq2\_P1-A-2\_01\_3199.d  
 Method lc-ms-hr-low.m  
 Sample Name lq2  
 Comment

Acquisition Date 2017/8/24 9:15:30

Operator zlwei  
 Instrument / Ser# microTOF-Q II 10351

## Acquisition Parameter

|             |          |                       |           |                  |           |
|-------------|----------|-----------------------|-----------|------------------|-----------|
| Source Type | ESI      | Ion Polarity          | Positive  | Set Nebulizer    | 0.4 Bar   |
| Focus       | Active   | Set Capillary         | 4500 V    | Set Dry Heater   | 200 °C    |
| Scan Begin  | 50 m/z   | Set End Plate Offset  | -500 V    | Set Dry Gas      | 5.0 l/min |
| Scan End    | 1200 m/z | Set Collision Cell RF | 100.0 Vpp | Set Divert Valve | Waste     |

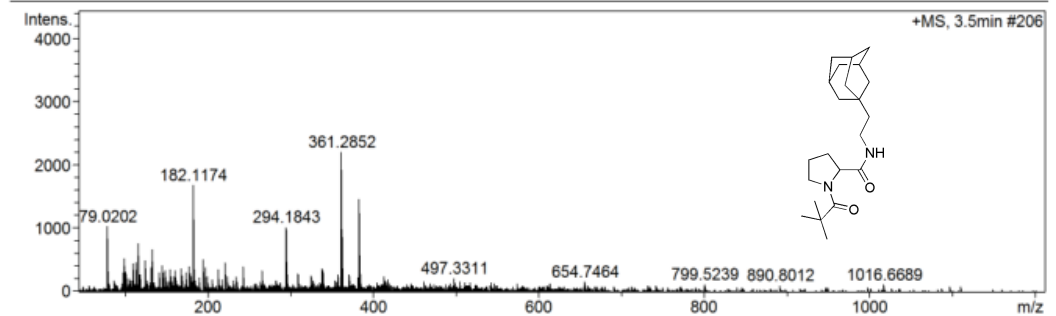

| Meas. # | Formula                                                       | m/z      | err [ppm] | Mean err [ppm] | rdB | N-Rule | ej% Conf | mSig   | Std I  | Std Mean m/z | Std I VarNorm | Std m/z Diff | Std Comb Dev |
|---------|---------------------------------------------------------------|----------|-----------|----------------|-----|--------|----------|--------|--------|--------------|---------------|--------------|--------------|
| 361.2   |                                                               |          |           |                |     |        |          |        |        |              |               |              |              |
| 852     |                                                               |          |           |                |     |        |          |        |        |              |               |              |              |
| 1       | C <sub>22</sub> H <sub>37</sub> N <sub>2</sub> O <sub>2</sub> | 361.2850 | -0.5      | 5.8            | 5.5 | ok     | even     | 112.60 | 0.1510 | 0.0060       | 0.0631        | 0.0041       | 0.8427       |

## HPLC

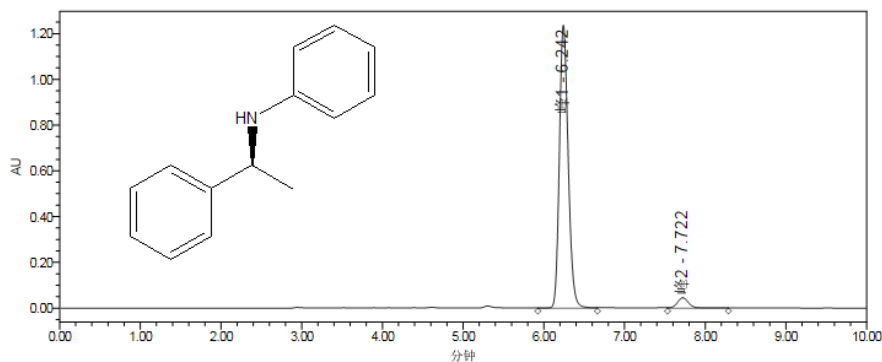

Channel: W2489 ChA; Channel Desc.: W2489 ChA 254nm; Processing Method: lq1

|   | Channel Description | Peak Name | RT (min) | Area (mV*sec) | % Area | Height (mV) |
|---|---------------------|-----------|----------|---------------|--------|-------------|
| 1 | W2489 ChA 254nm     | 峰1        | 6.242    | 9362910       | 95.61  | 1236048     |
| 2 | W2489 ChA 254nm     | 峰2        | 7.722    | 429830        | 4.39   | 44763       |



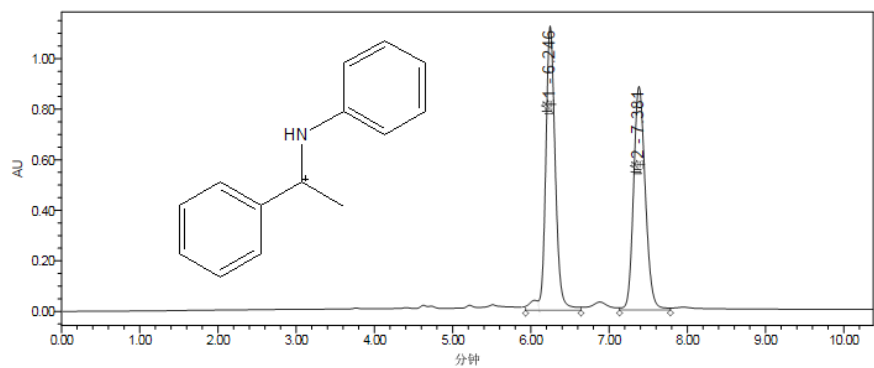

Channel: W2489 ChA; Channel Desc.: W2489 ChA 254nm; Processing Method: LIQIANG

|   | Channel Description | Peak Name | RT (min) | Area (msec) | % Area | Height (msec) |
|---|---------------------|-----------|----------|-------------|--------|---------------|
| 1 | W2489 ChA 254nm     | 峰1        | 6.246    | 9386594     | 50.41  | 1123917       |
| 2 | W2489 ChA 254nm     | 峰2        | 7.381    | 9235048     | 49.59  | 884396        |

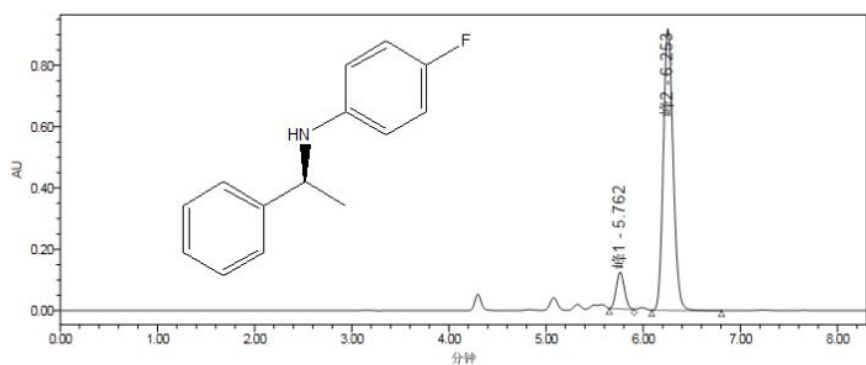

Channel: W2489 ChA; Channel Desc.: W2489 ChA 254nm; Processing Method: 0

|   | Channel Description | Peak Name | RT (min) | Area (msec) | % Area | Height (msec) |
|---|---------------------|-----------|----------|-------------|--------|---------------|
| 1 | W2489 ChA 254nm     | 峰1        | 5.762    | 702719      | 9.80   | 119171        |
| 2 | W2489 ChA 254nm     | 峰2        | 6.253    | 6465106     | 90.20  | 917791        |

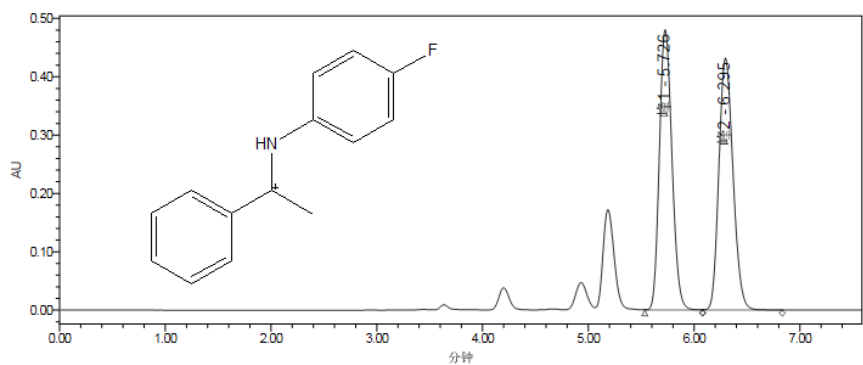

Channel: W2489 ChA; Channel Desc.: W2489 ChA 254nm; Processing Method: 0

|   | Channel Description | Peak Name | RT (min) | Area (msec) | % Area | Height (msec) |
|---|---------------------|-----------|----------|-------------|--------|---------------|
| 1 | W2489 ChA 254nm     | 峰1        | 5.726    | 3951884     | 49.63  | 479903        |
| 2 | W2489 ChA 254nm     | 峰2        | 6.295    | 4010403     | 50.37  | 431559        |

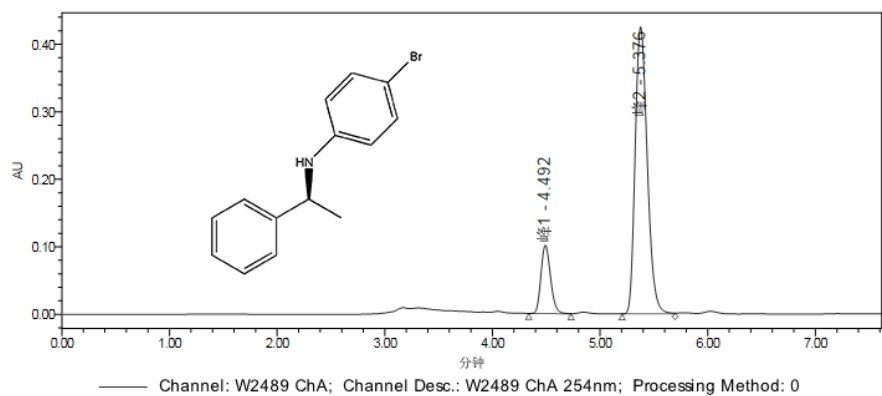

|   | Channel Description | Peak Name | RT (min) | Area (msec) | % Area | Height (msec) |
|---|---------------------|-----------|----------|-------------|--------|---------------|
| 1 | W2489 ChA 254nm     | 峰1        | 4.492    | 627061      | 15.89  | 100999        |
| 2 | W2489 ChA 254nm     | 峰2        | 5.376    | 3318898     | 84.11  | 424666        |

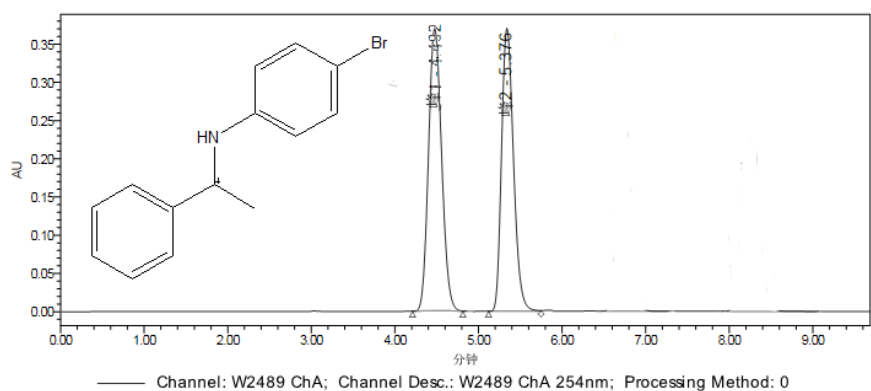

|   | Channel Description | Peak Name | RT (min) | Area (msec) | % Area | Height (msec) |
|---|---------------------|-----------|----------|-------------|--------|---------------|
| 1 | W2489 ChA 254nm     | 峰1        | 4.492    | 3807819     | 49.93  | 300043        |
| 2 | W2489 ChA 254nm     | 峰2        | 5.376    | 3817806     | 50.07  | 297054        |

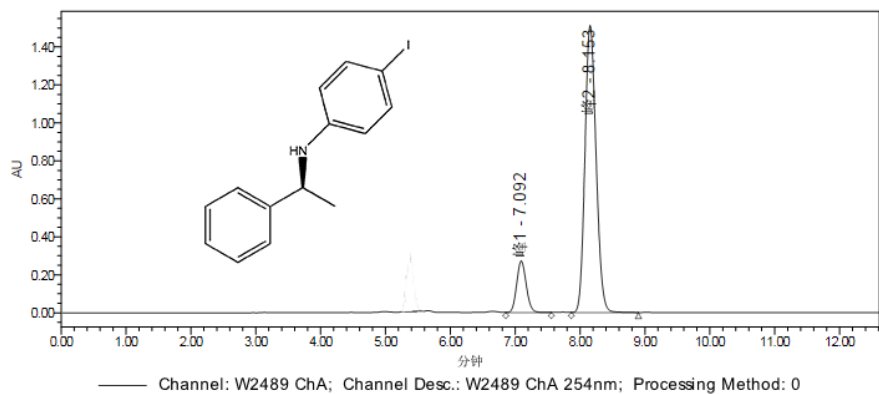

|   | Channel Description | Peak Name | RT (min) | Area (msec) | % Area | Height (msec) |
|---|---------------------|-----------|----------|-------------|--------|---------------|
| 1 | W2489 ChA 254nm     | 峰1        | 7.092    | 2788118     | 13.42  | 271343        |
| 2 | W2489 ChA 254nm     | 峰2        | 8.153    | 17990333    | 86.58  | 1510941       |

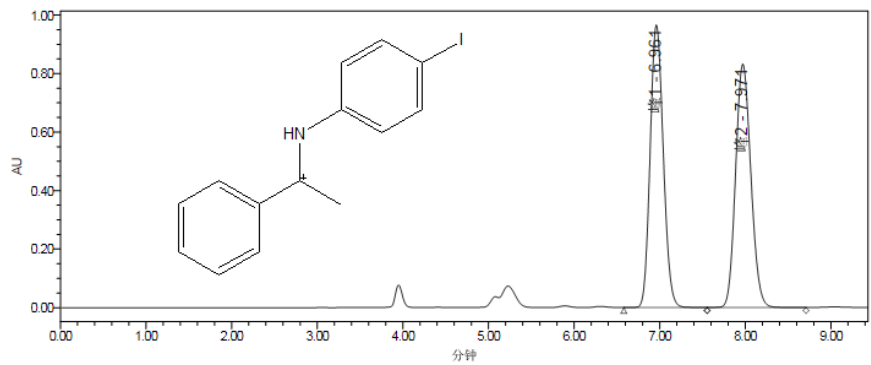

|   | Channel Description | Peak Name | RT (min) | Area (峰*sec) | % Area | Height (峰) |
|---|---------------------|-----------|----------|--------------|--------|------------|
| 1 | W2489 ChA 254nm     | 峰1        | 6.961    | 10303897     | 49.95  | 965560     |
| 2 | W2489 ChA 254nm     | 峰2        | 7.971    | 10324388     | 50.05  | 831712     |

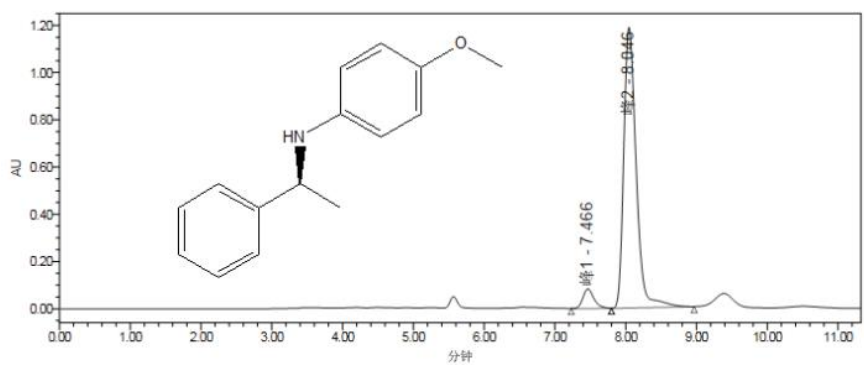

|   | Channel Description | Peak Name | RT (min) | Area (峰*sec) | % Area | Height (峰) |
|---|---------------------|-----------|----------|--------------|--------|------------|
| 1 | W2489 ChA 254nm     | 峰1        | 7.466    | 900862       | 5.88   | 82697      |
| 2 | W2489 ChA 254nm     | 峰2        | 8.046    | 14410613     | 94.12  | 1187363    |

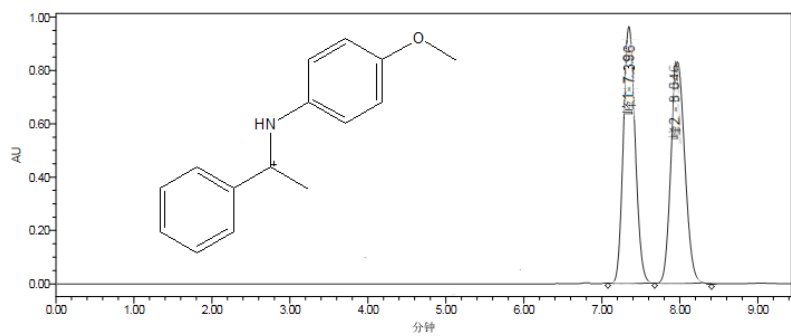

|   | Channel Description | Peak Name | RT (min) | Area (峰*sec) | % Area | Height (峰) |
|---|---------------------|-----------|----------|--------------|--------|------------|
| 1 | W2489 ChA 254nm     | 峰1        | 7.396    | 938659       | 50.41  | 112391     |
| 2 | W2489 ChA 254nm     | 峰2        | 8.046    | 923504       | 49.59  | 88439      |

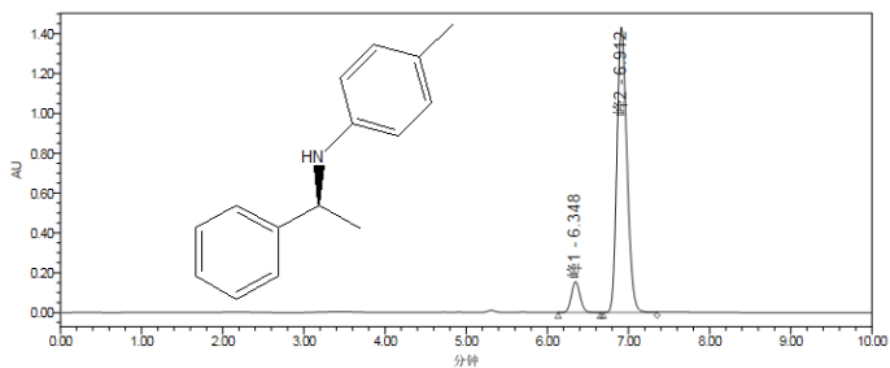

|   | Channel Description | Peak Name | RT (min) | Area (msec) | % Area | Height (msec) |
|---|---------------------|-----------|----------|-------------|--------|---------------|
| 1 | W2489 ChA 254nm     | 峰1        | 6.348    | 1163202     | 8.66   | 153830        |
| 2 | W2489 ChA 254nm     | 峰2        | 6.912    | 12269310    | 91.34  | 1431209       |

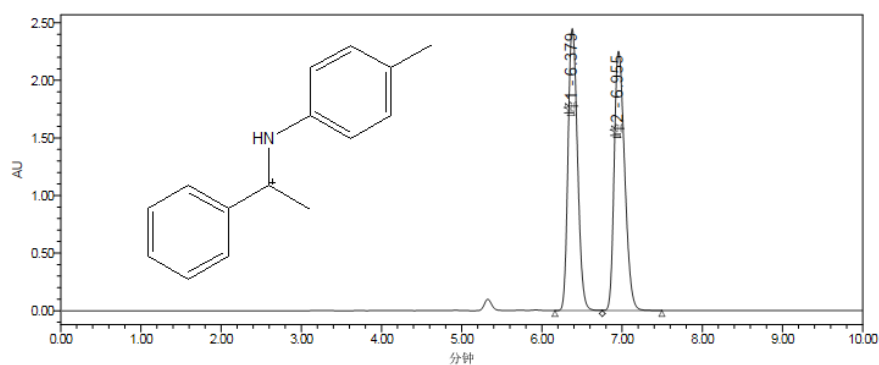

|   | Channel Description | Peak Name | RT (min) | Area (msec) | % Area | Height (msec) |
|---|---------------------|-----------|----------|-------------|--------|---------------|
| 1 | W2489 ChA 254nm     | 峰1        | 6.379    | 20070337    | 49.56  | 2446473       |
| 2 | W2489 ChA 254nm     | 峰2        | 6.955    | 20429499    | 50.44  | 2250852       |

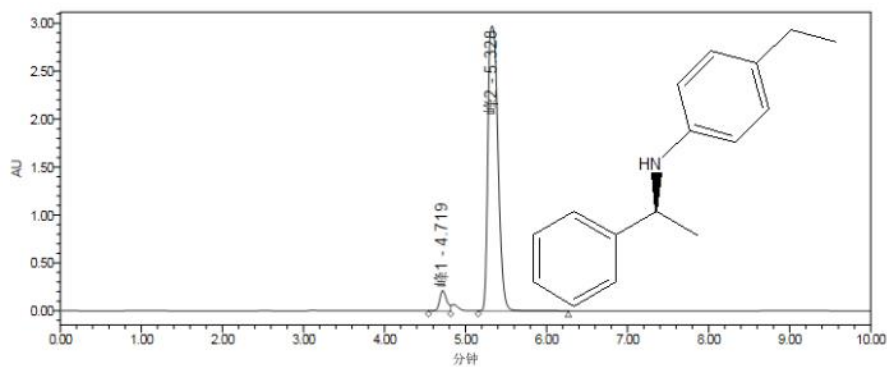

|   | Channel Description | Peak Name | RT (min) | Area (msec) | % Area | Height (msec) |
|---|---------------------|-----------|----------|-------------|--------|---------------|
| 1 | W2489 ChA 254nm     | 峰1        | 4.719    | 1269893     | 4.73   | 210794        |
| 2 | W2489 ChA 254nm     | 峰2        | 5.328    | 25551167    | 95.27  | 2968194       |

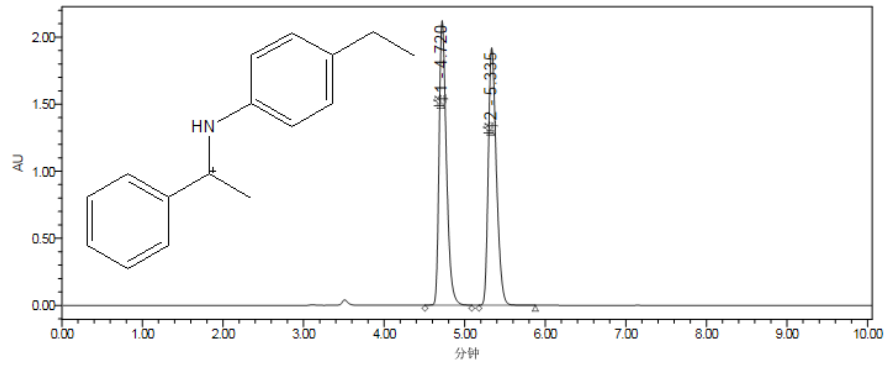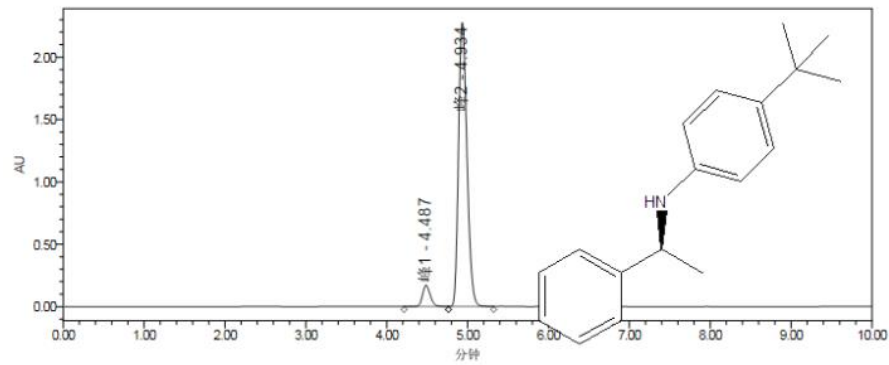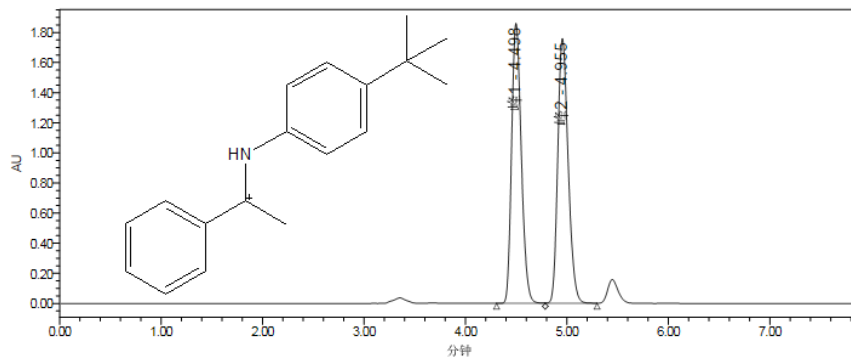

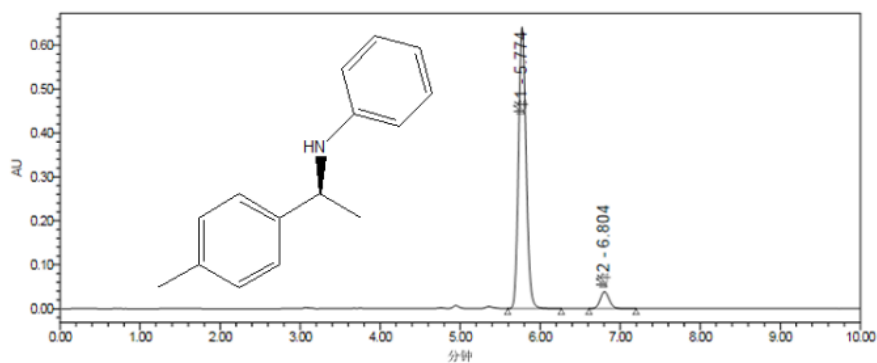

|   | Channel Description | Peak Name | RT (min) | Area (mV*sec) | % Area | Height (mV) |
|---|---------------------|-----------|----------|---------------|--------|-------------|
| 1 | W2489 ChA 254nm     | 峰1        | 5.774    | 4208577       | 93.29  | 640161      |
| 2 | W2489 ChA 254nm     | 峰2        | 6.804    | 302551        | 6.71   | 38666       |

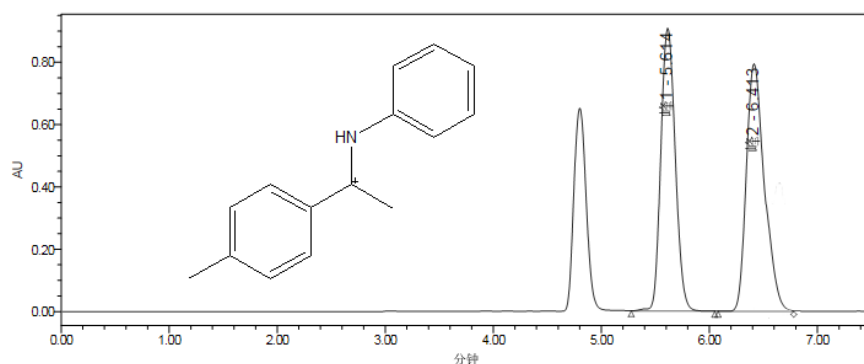

|   | Channel Description | Peak Name | RT (min) | Area (mV*sec) | % Area | Height (mV) |
|---|---------------------|-----------|----------|---------------|--------|-------------|
| 1 | W2489 ChA 254nm     | 峰1        | 5.614    | 8442368       | 50.23  | 907442      |
| 2 | W2489 ChA 254nm     | 峰2        | 6.413    | 8365412       | 49.77  | 793831      |

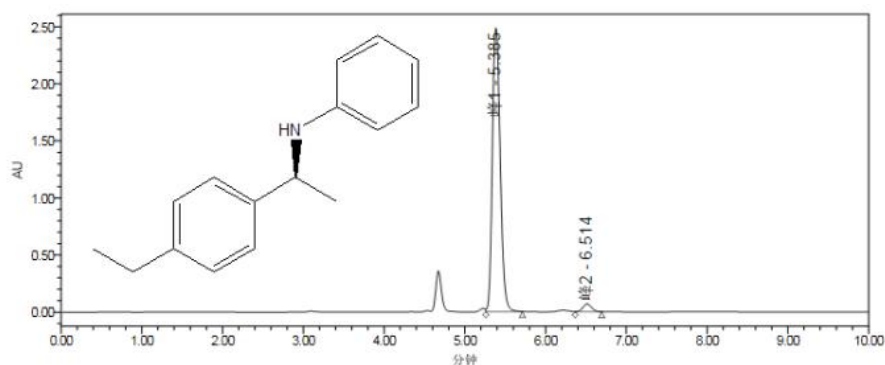

|   | Channel Description | Peak Name | RT (min) | Area (mV*sec) | % Area | Height (mV) |
|---|---------------------|-----------|----------|---------------|--------|-------------|
| 1 | W2489 ChA 254nm     | 峰1        | 5.385    | 16819132      | 97.09  | 2483304     |
| 2 | W2489 ChA 254nm     | 峰2        | 6.514    | 504990        | 2.91   | 67790       |



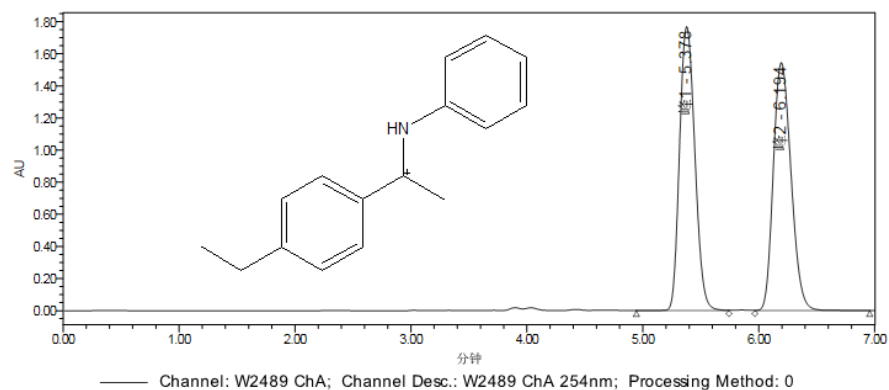

|   | Channel Description | Peak Name | RT (min) | Area (msec) | % Area | Height (msec) |
|---|---------------------|-----------|----------|-------------|--------|---------------|
| 1 | W2489 ChA 254nm     | 峰1        | 5.378    | 16253069    | 49.72  | 1767443       |
| 2 | W2489 ChA 254nm     | 峰2        | 6.194    | 16438263    | 50.28  | 1544012       |

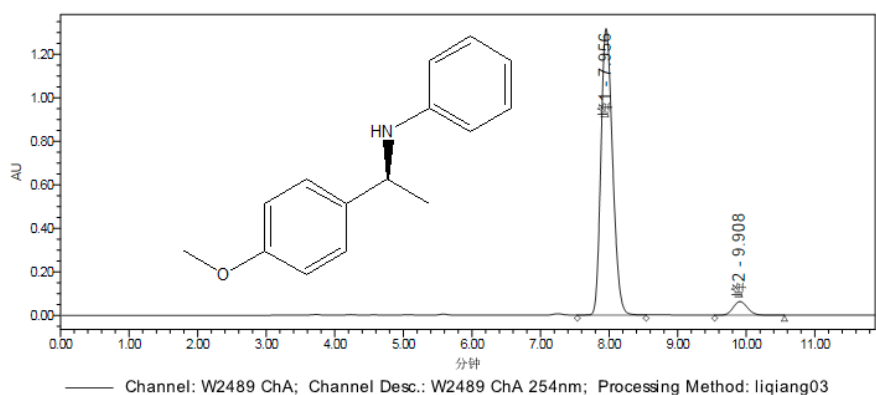

|   | Channel Description | Peak Name | RT (min) | Area (msec) | % Area | Height (msec) |
|---|---------------------|-----------|----------|-------------|--------|---------------|
| 1 | W2489 ChA 254nm     | 峰1        | 7.956    | 15615141    | 94.45  | 1316899       |
| 2 | W2489 ChA 254nm     | 峰2        | 9.908    | 917732      | 5.55   | 62723         |

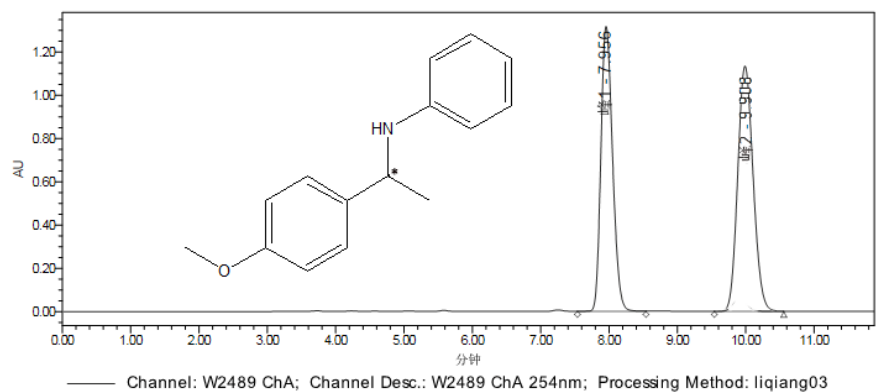

|   | Channel Description | Peak Name | RT (min) | Area (msec) | % Area | Height (msec) |
|---|---------------------|-----------|----------|-------------|--------|---------------|
| 1 | W2489 ChA 254nm     | 峰1        | 7.956    | 9386594     | 50.41  | 1123917       |
| 2 | W2489 ChA 254nm     | 峰2        | 9.908    | 9235048     | 49.59  | 884396        |

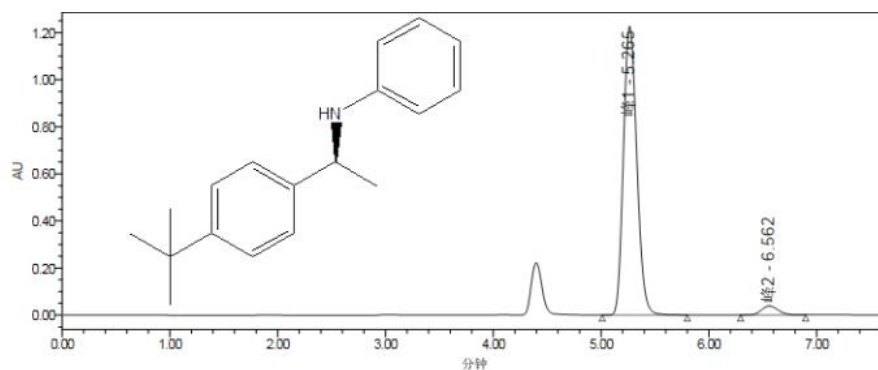

|   | Channel Description | Peak Name | RT (min) | Area (msec) | % Area | Height (msec) |
|---|---------------------|-----------|----------|-------------|--------|---------------|
| 1 | W2489 ChA 254nm     | 峰1        | 5.265    | 10580802    | 96.31  | 1224932       |
| 2 | W2489 ChA 254nm     | 峰2        | 6.562    | 405051      | 3.69   | 37913         |

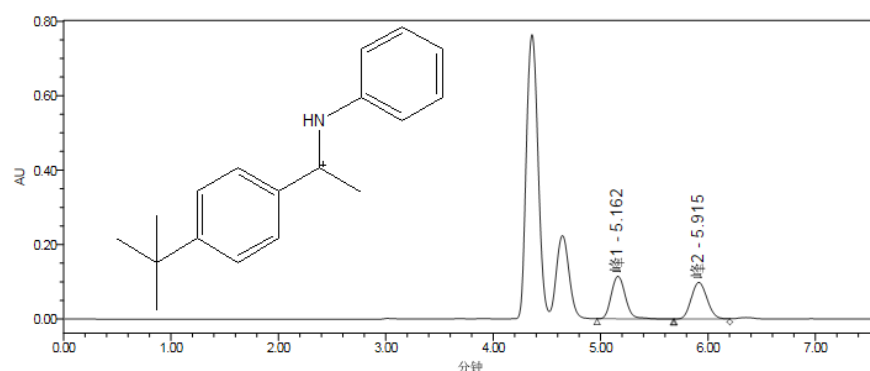

|   | Channel Description | Peak Name | RT (min) | Area (msec) | % Area | Height (msec) |
|---|---------------------|-----------|----------|-------------|--------|---------------|
| 1 | W2489 ChA 254nm     | 峰1        | 5.162    | 1036118     | 50.87  | 113868        |
| 2 | W2489 ChA 254nm     | 峰2        | 5.915    | 1000843     | 49.13  | 98085         |

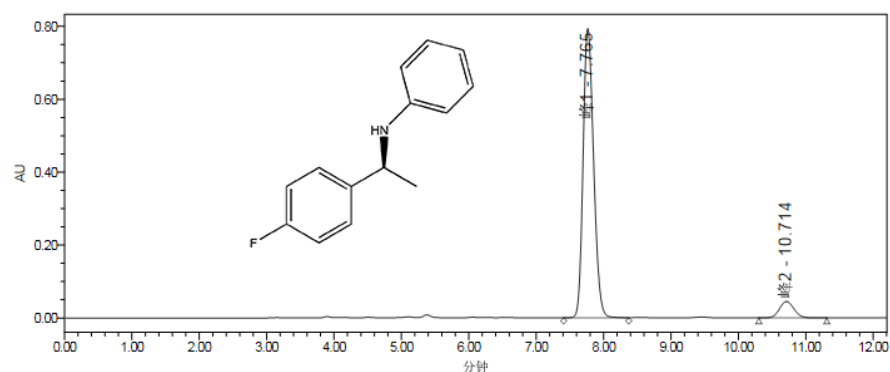

|   | Channel Description | Peak Name | RT (min) | Area (msec) | % Area | Height (msec) |
|---|---------------------|-----------|----------|-------------|--------|---------------|
| 1 | W2489 ChA 254nm     | 峰1        | 7.765    | 8611183     | 92.79  | 793297        |
| 2 | W2489 ChA 254nm     | 峰2        | 10.714   | 669493      | 7.21   | 45015         |

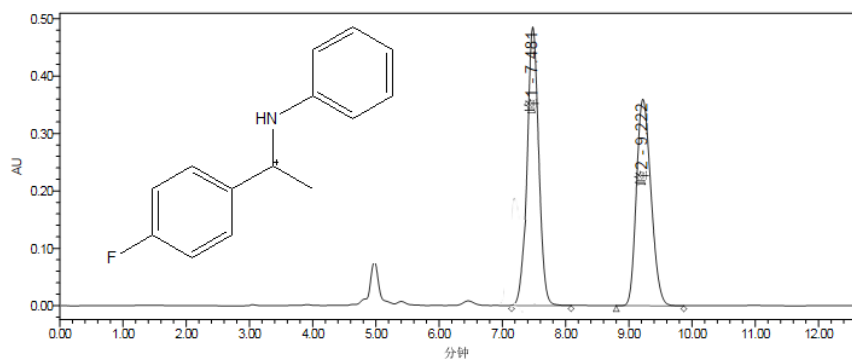

|   | Channel Description | Peak Name | RT (min) | Area (mV*sec) | % Area | Height (mV) |
|---|---------------------|-----------|----------|---------------|--------|-------------|
| 1 | W2489 ChA 254nm     | 峰1        | 7.481    | 6027361       | 51.18  | 484857      |
| 2 | W2489 ChA 254nm     | 峰2        | 9.222    | 5750160       | 48.82  | 359497      |

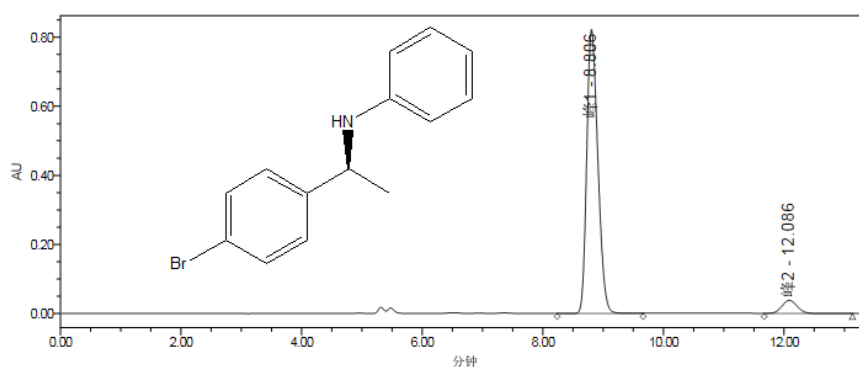

|   | Channel Description | Peak Name | RT (min) | Area (mV*sec) | % Area | Height (mV) |
|---|---------------------|-----------|----------|---------------|--------|-------------|
| 1 | W2489 ChA 254nm     | 峰1        | 8.806    | 10540583      | 93.94  | 821422      |
| 2 | W2489 ChA 254nm     | 峰2        | 12.086   | 679668        | 6.06   | 38093       |

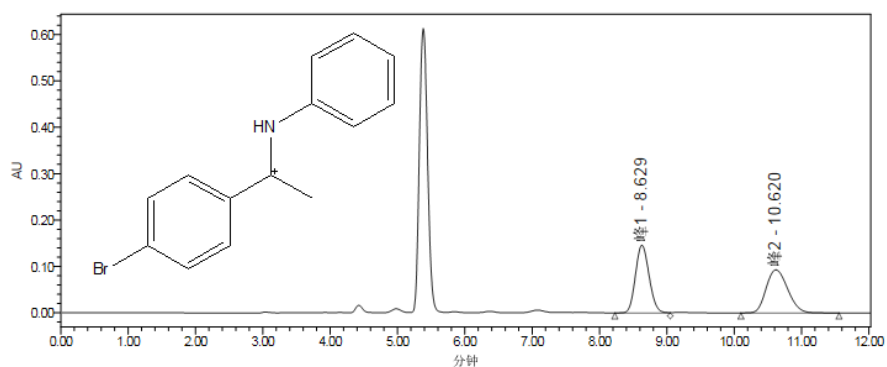

|   | Channel Description | Peak Name | RT (min) | Area (mV*sec) | % Area | Height (mV) |
|---|---------------------|-----------|----------|---------------|--------|-------------|
| 1 | W2489 ChA 254nm     | 峰1        | 8.629    | 2046108       | 50.00  | 145922      |
| 2 | W2489 ChA 254nm     | 峰2        | 10.620   | 2045971       | 50.00  | 92698       |

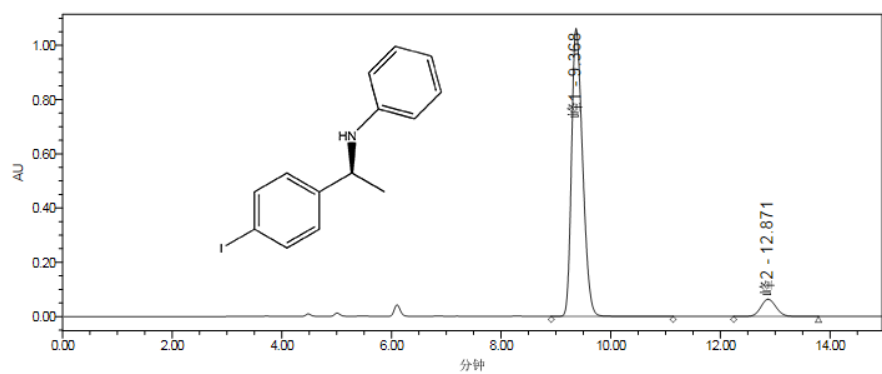

|   | Channel Description | Peak Name | RT (min) | Area (峰*sec) | % Area | Height (峰) |
|---|---------------------|-----------|----------|--------------|--------|------------|
| 1 | W2489 ChA 254nm     | 峰1        | 9.368    | 14877768     | 92.44  | 1061310    |
| 2 | W2489 ChA 254nm     | 峰2        | 12.871   | 1216198      | 7.56   | 63454      |

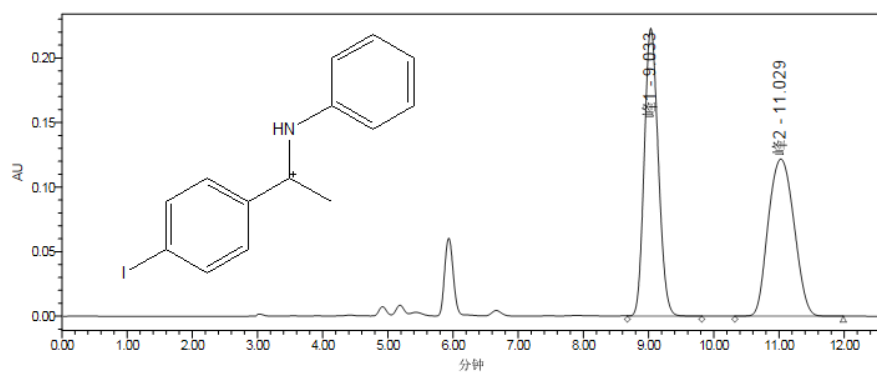

|   | Channel Description | Peak Name | RT (min) | Area (峰*sec) | % Area | Height (峰) |
|---|---------------------|-----------|----------|--------------|--------|------------|
| 1 | W2489 ChA 254nm     | 峰1        | 9.033    | 3328526      | 49.88  | 222803     |
| 2 | W2489 ChA 254nm     | 峰2        | 11.029   | 3343951      | 50.12  | 121658     |

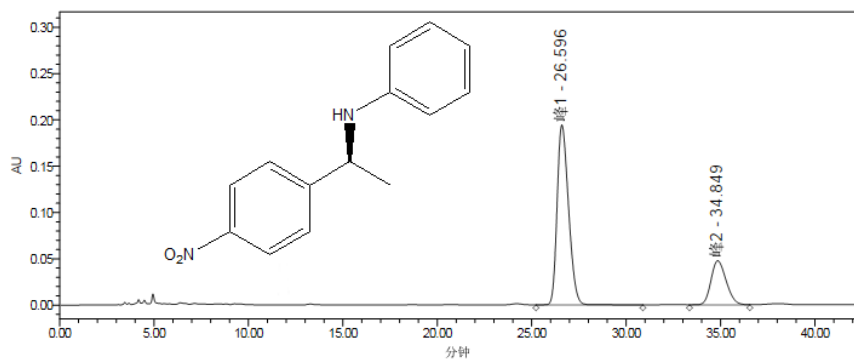

|   | Channel Description | Peak Name | RT (min) | Area (峰*sec) | % Area | Height (峰) |
|---|---------------------|-----------|----------|--------------|--------|------------|
| 1 | W2489 ChA 254nm     | 峰1        | 26.596   | 8160778      | 75.44  | 194285     |
| 2 | W2489 ChA 254nm     | 峰2        | 34.849   | 2656709      | 24.56  | 47605      |

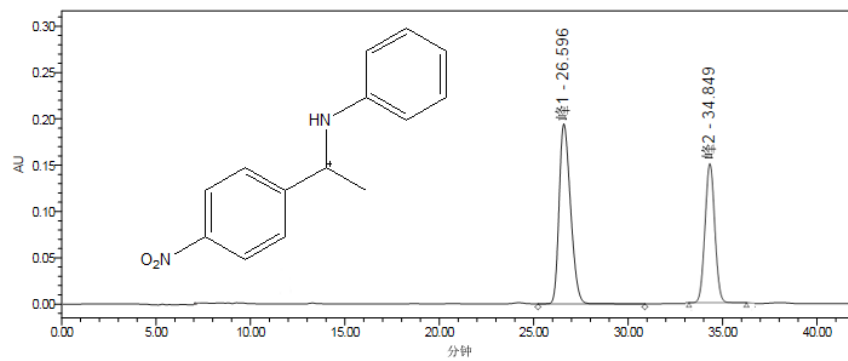

|   | Channel Description | Peak Name | RT (min) | Area (mm <sup>2</sup> sec) | % Area | Height (mm) |
|---|---------------------|-----------|----------|----------------------------|--------|-------------|
| 1 | W2489 ChA 254nm     | 峰1        | 26.596   | 8160778                    | 49.90  | 194285      |
| 2 | W2489 ChA 254nm     | 峰2        | 34.849   | 2656709                    | 50.10  | 147605      |

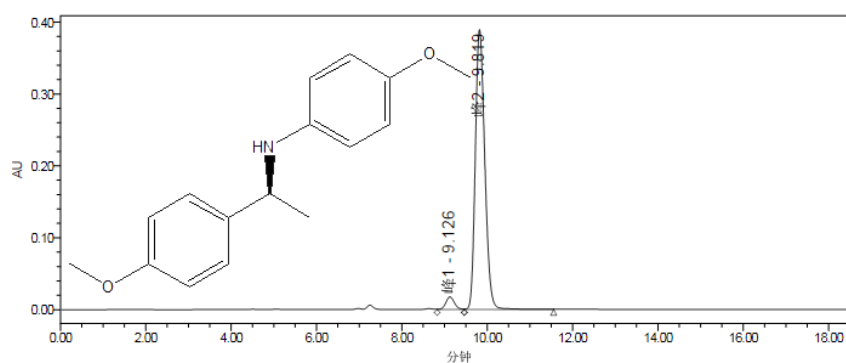

|   | Channel Description | Peak Name | RT (min) | Area (mm <sup>2</sup> sec) | % Area | Height (mm) |
|---|---------------------|-----------|----------|----------------------------|--------|-------------|
| 1 | W2489 ChA 254nm     | 峰1        | 9.126    | 246387                     | 3.96   | 17438       |
| 2 | W2489 ChA 254nm     | 峰2        | 9.819    | 5975373                    | 96.04  | 389090      |

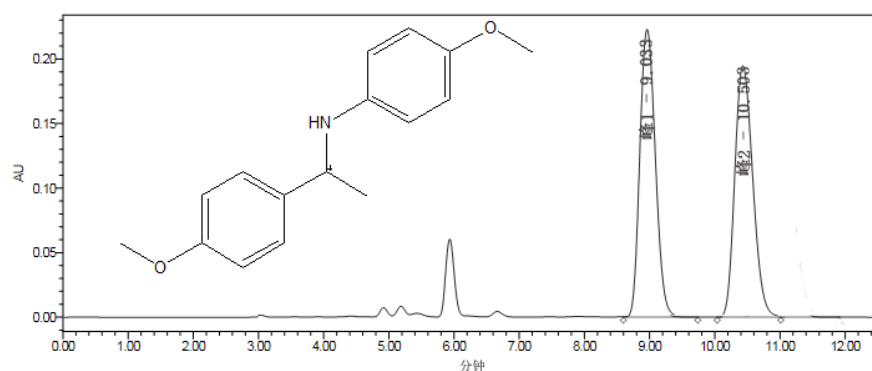

|   | Channel Description | Peak Name | RT (min) | Area (mm <sup>2</sup> sec) | % Area | Height (mm) |
|---|---------------------|-----------|----------|----------------------------|--------|-------------|
| 1 | W2489 ChA 254nm     | 峰1        | 9.033    | 3328526                    | 49.88  | 222803      |
| 2 | W2489 ChA 254nm     | 峰2        | 10.503   | 3343951                    | 50.12  | 121658      |

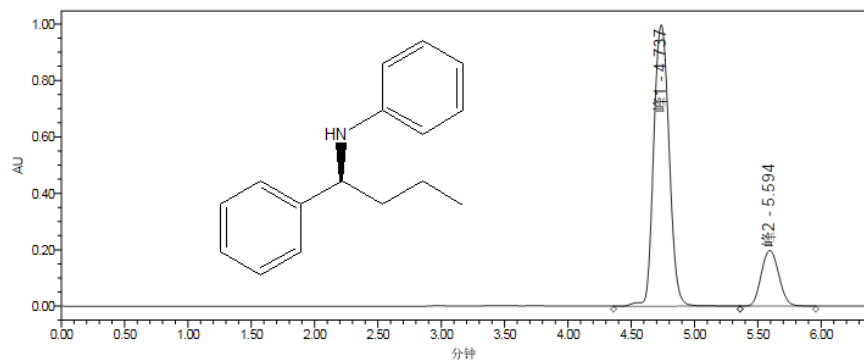

|   | Channel Description | Peak Name | RT (min) | Area (AU*sec) | % Area | Height (AU) |
|---|---------------------|-----------|----------|---------------|--------|-------------|
| 1 | W2489 ChA 254nm     | 峰1        | 4.737    | 8461252       | 81.61  | 996454      |
| 2 | W2489 ChA 254nm     | 峰2        | 5.594    | 1907149       | 18.39  | 196964      |

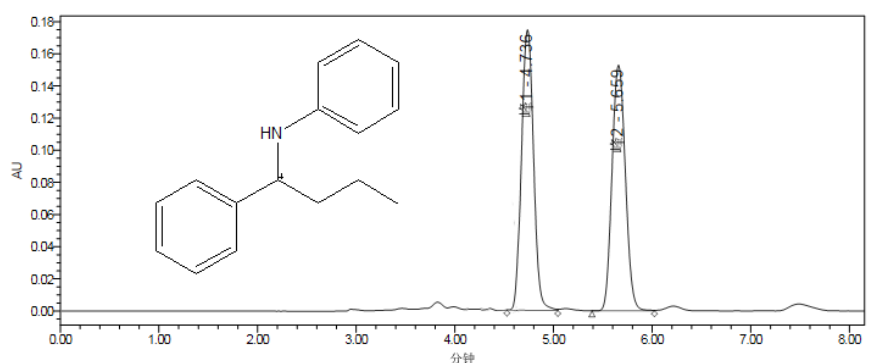

|   | Channel Description | Peak Name | RT (min) | Area (AU*sec) | % Area | Height (AU) |
|---|---------------------|-----------|----------|---------------|--------|-------------|
| 1 | W2489 ChA 254nm     | 峰1        | 4.736    | 1461437       | 50.38  | 174331      |
| 2 | W2489 ChA 254nm     | 峰2        | 5.659    | 1439479       | 49.62  | 152656      |

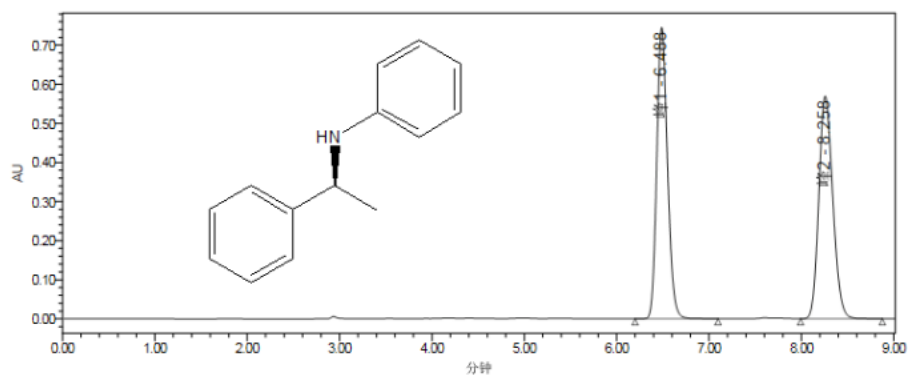

|   | Channel Description | Peak Name | RT (min) | Area (AU*sec) | % Area | Height (AU) |
|---|---------------------|-----------|----------|---------------|--------|-------------|
| 1 | W2489 ChA 254nm     | 峰1        | 6.488    | 5987923       | 50.00  | 744618      |
| 2 | W2489 ChA 254nm     | 峰2        | 8.258    | 5986924       | 50.00  | 569117      |

NMR



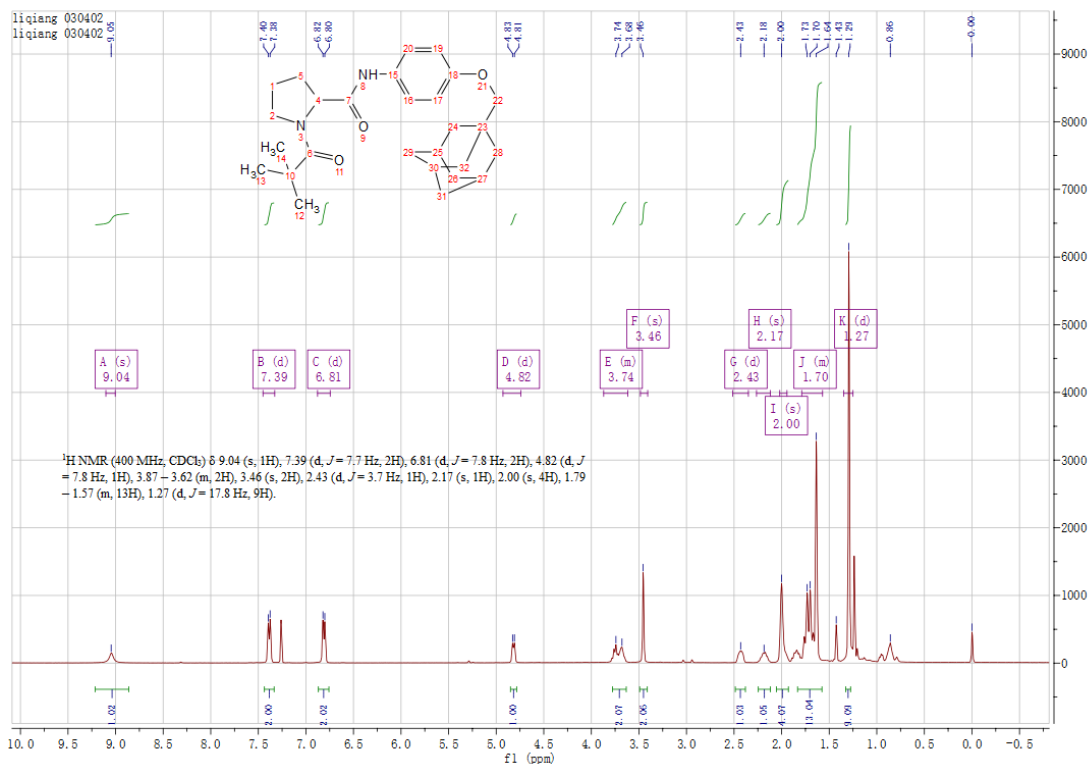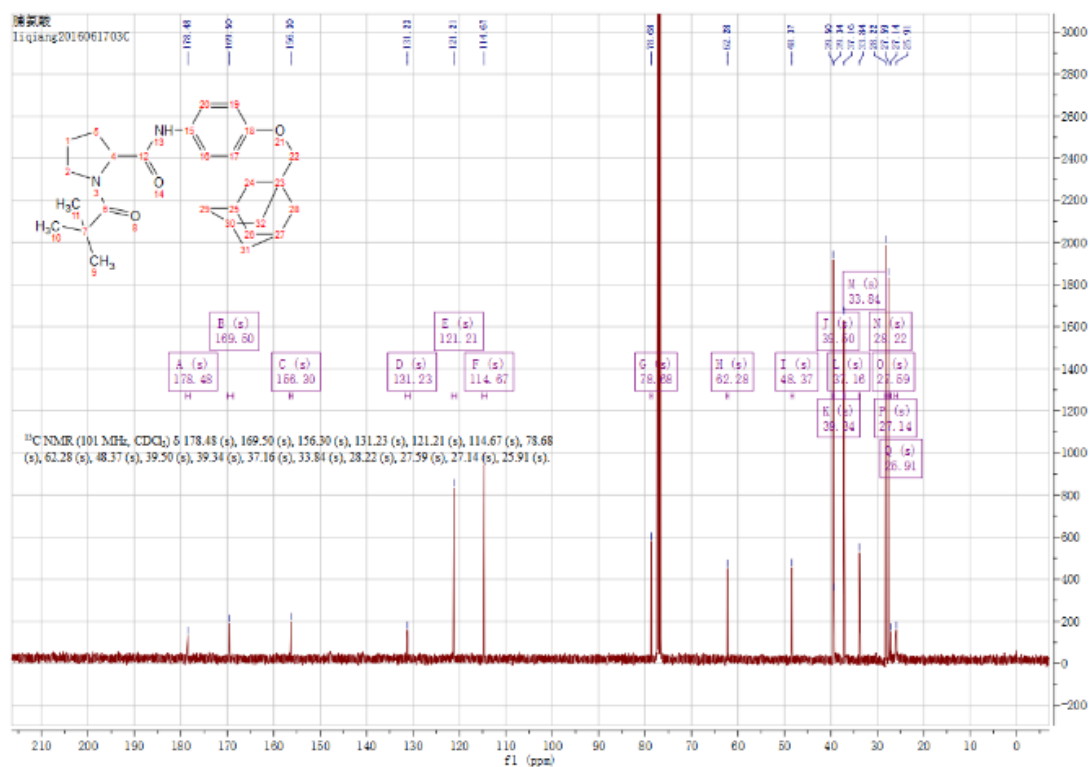

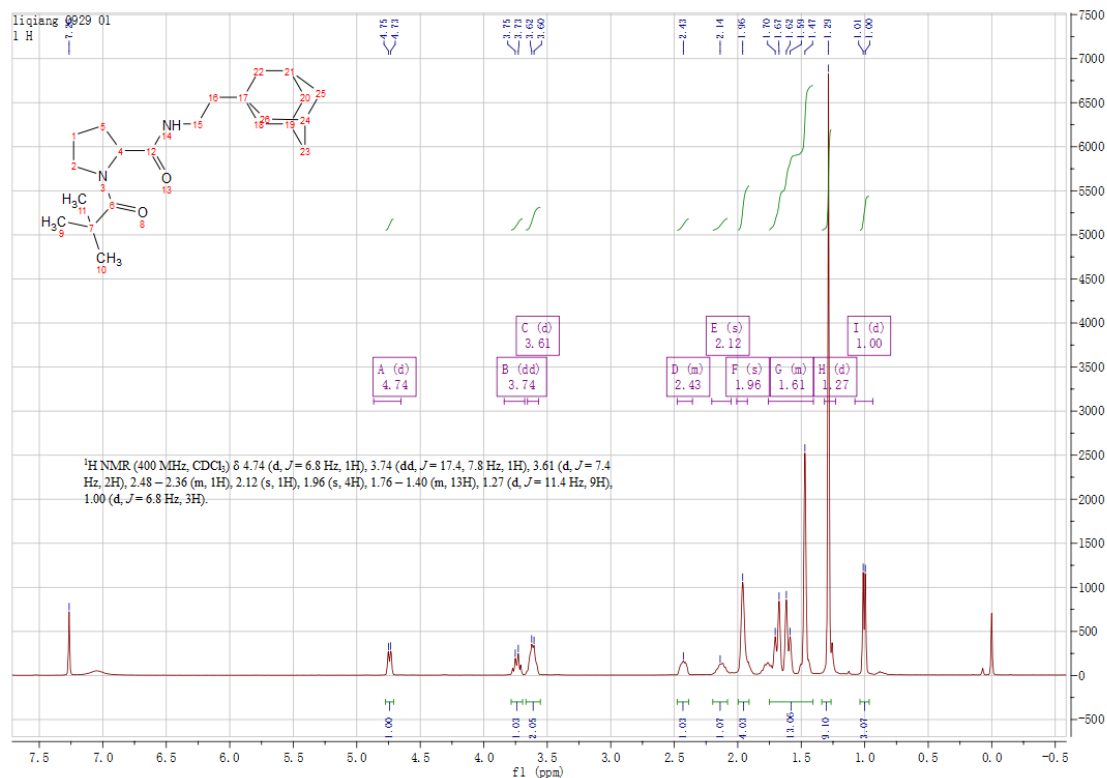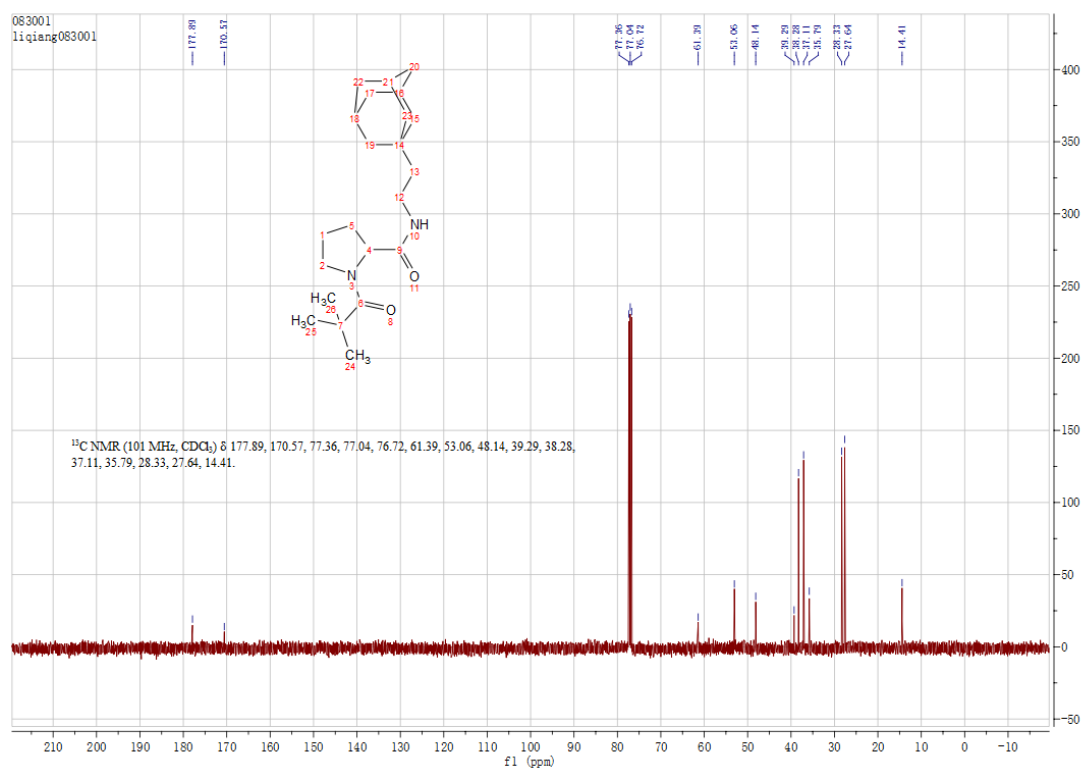

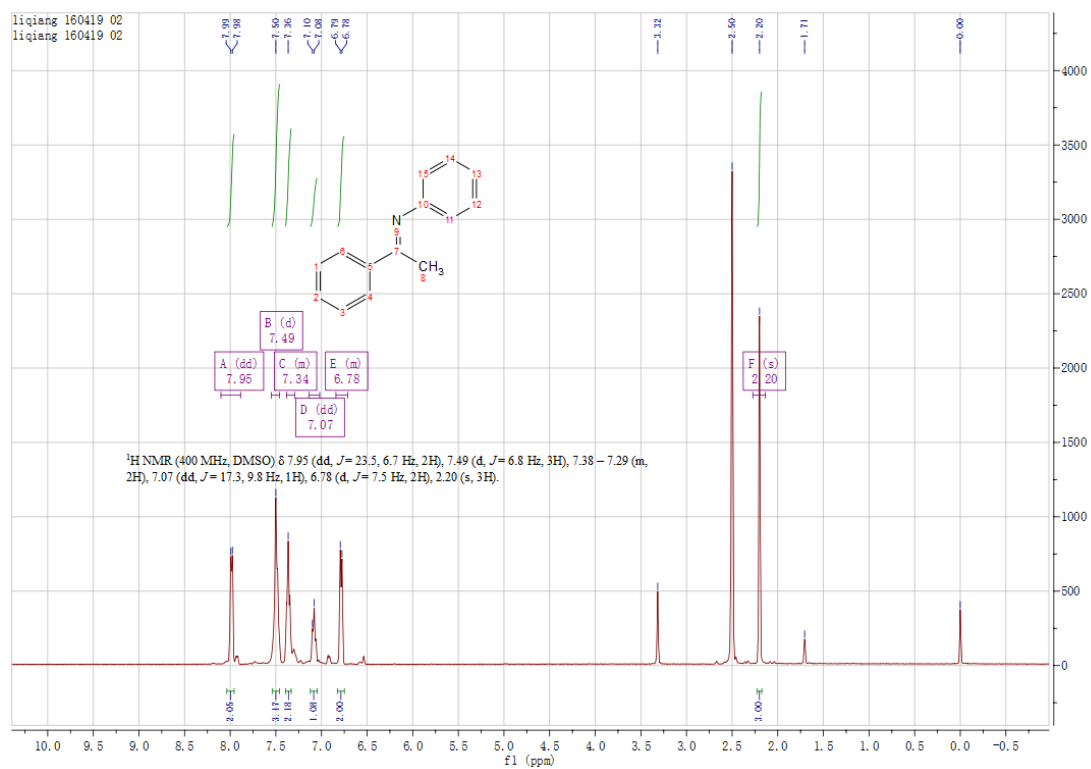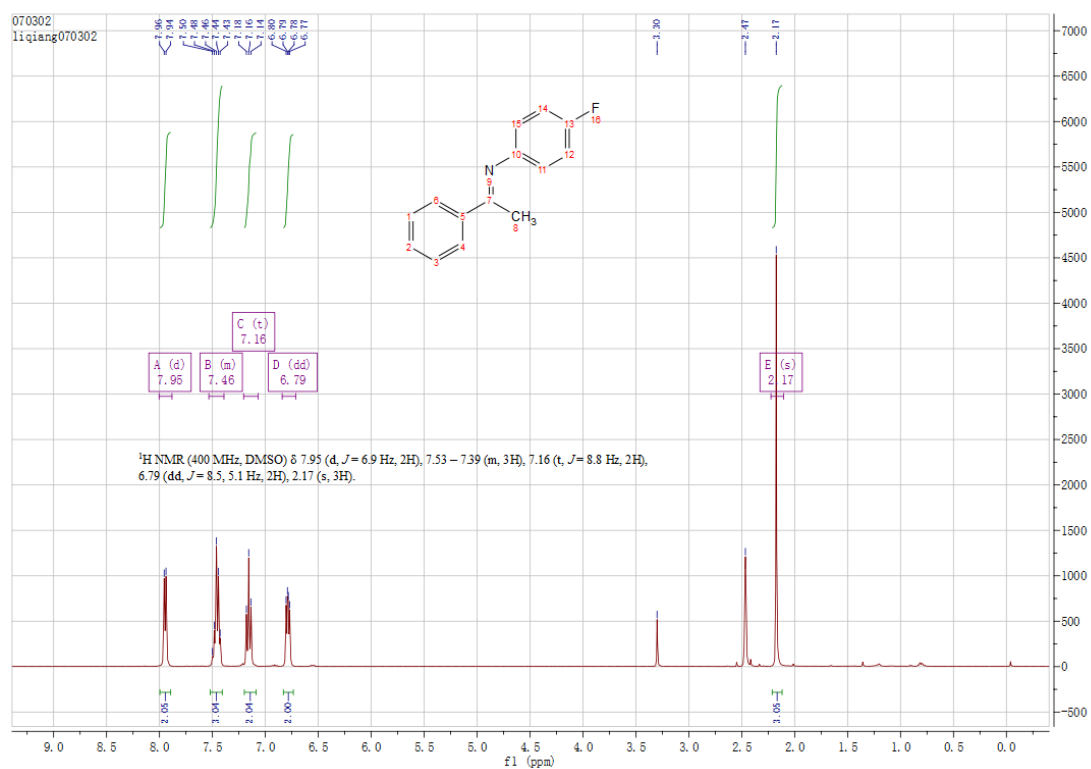

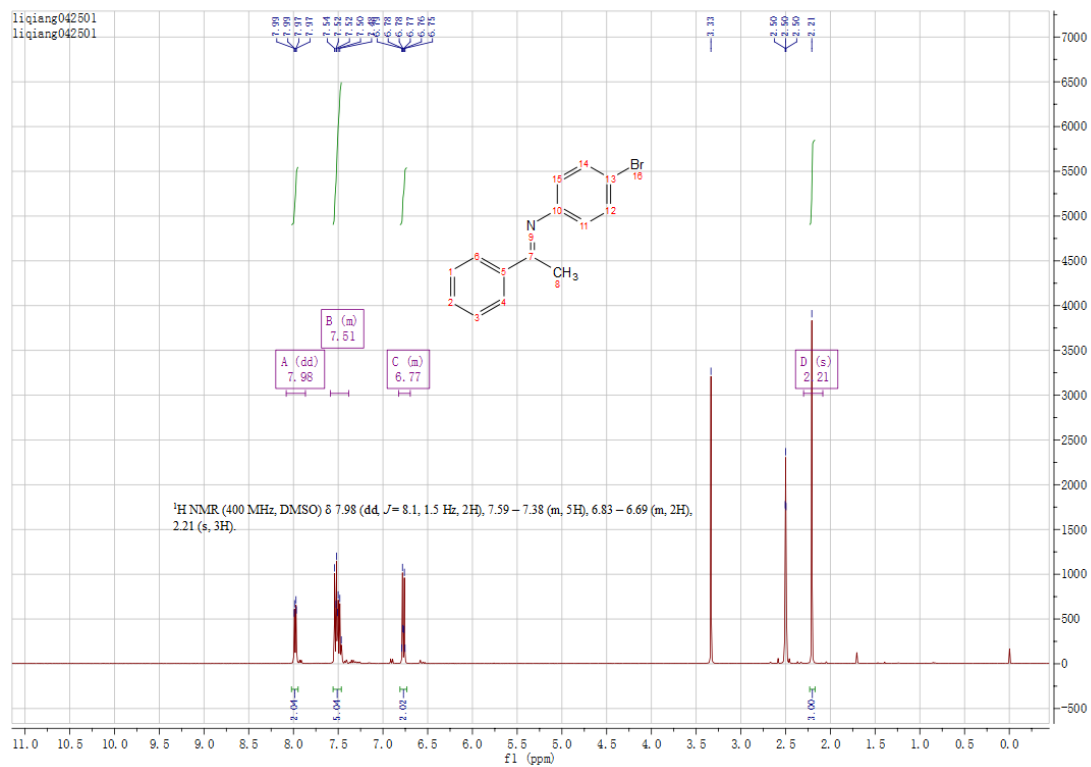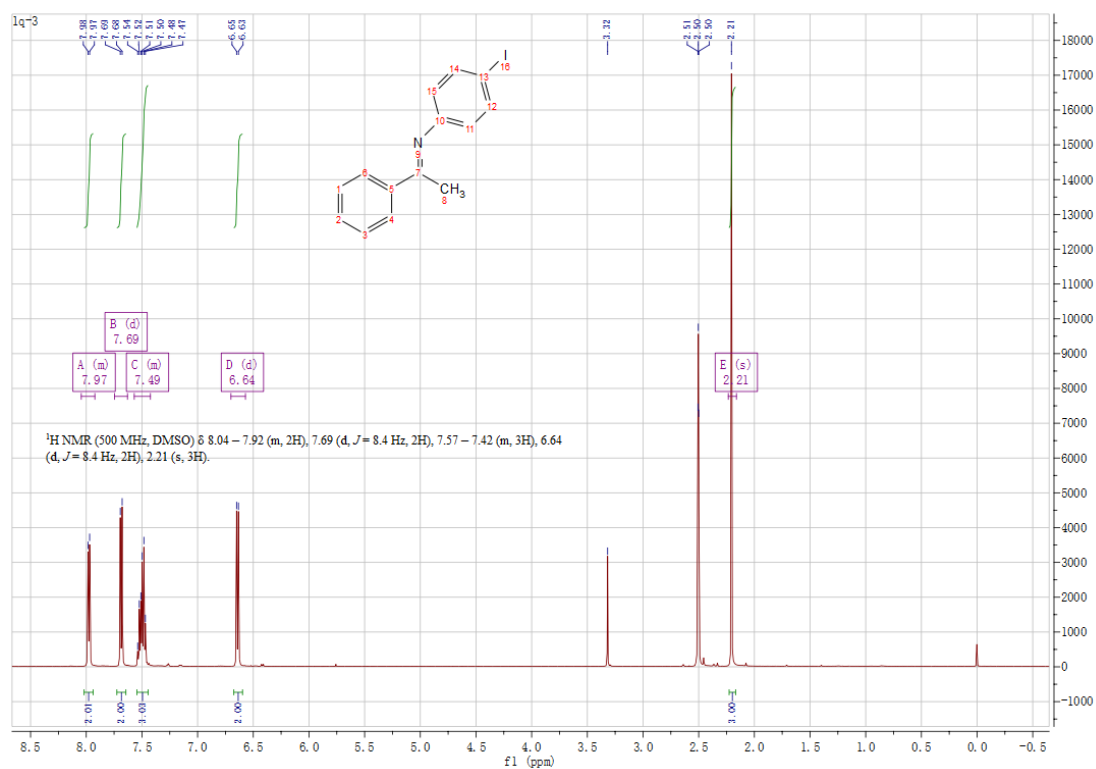

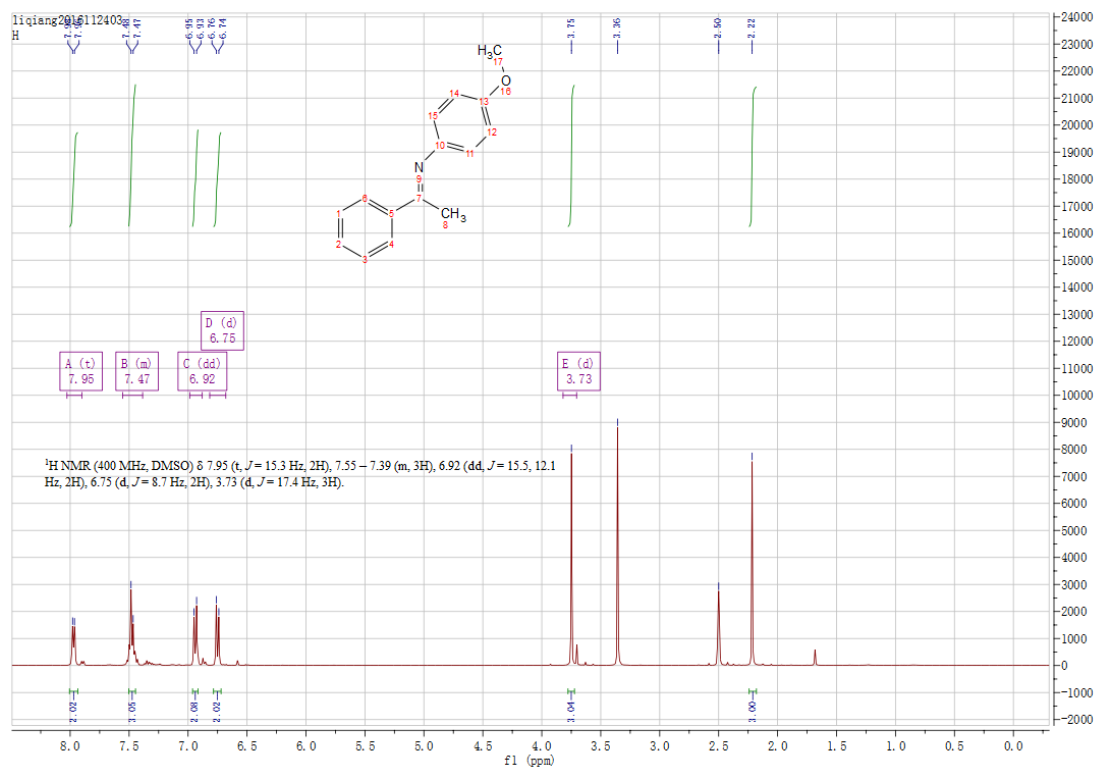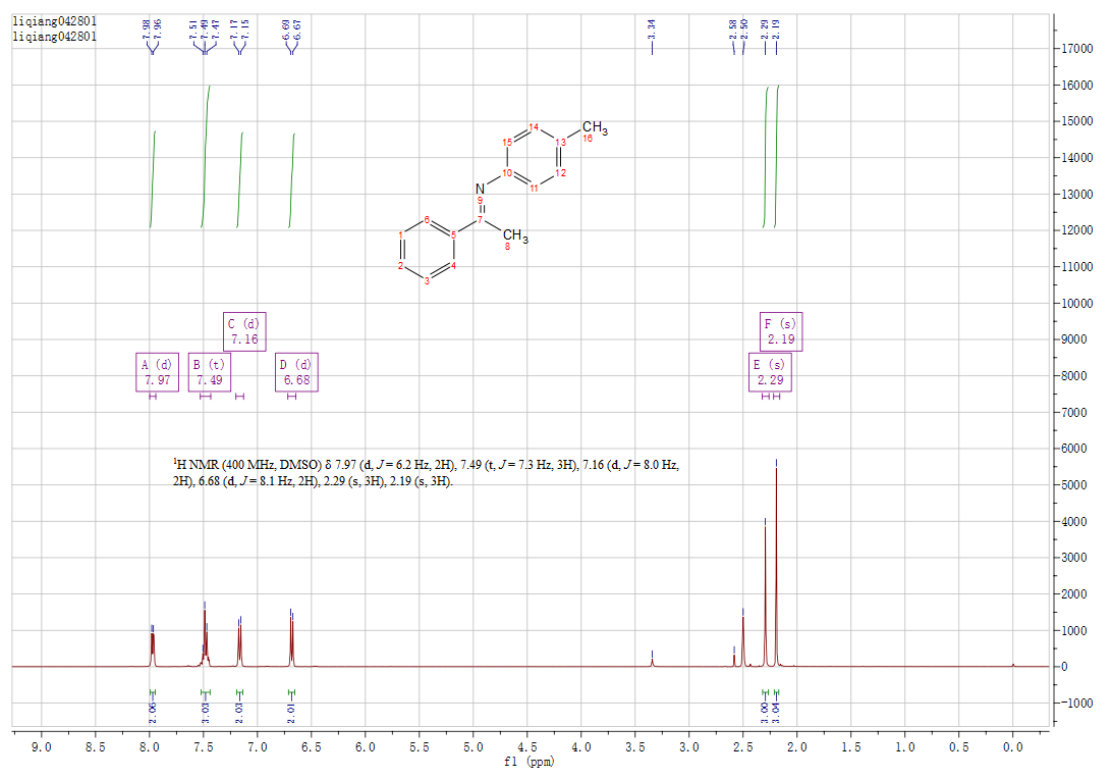

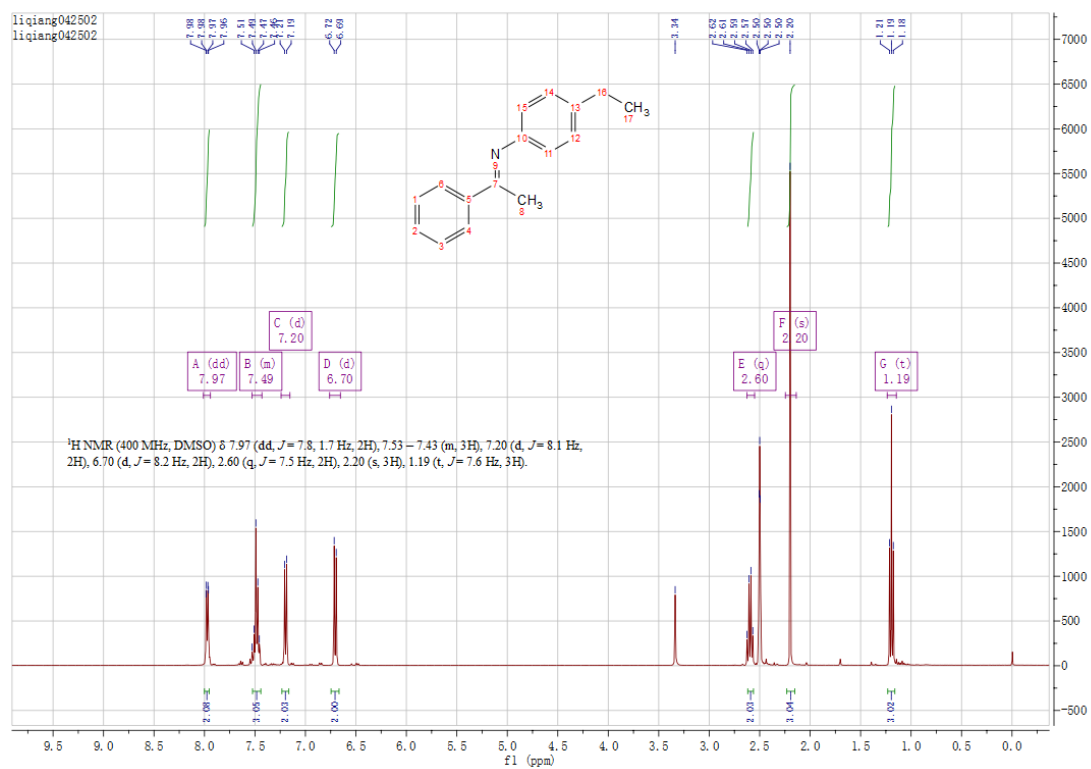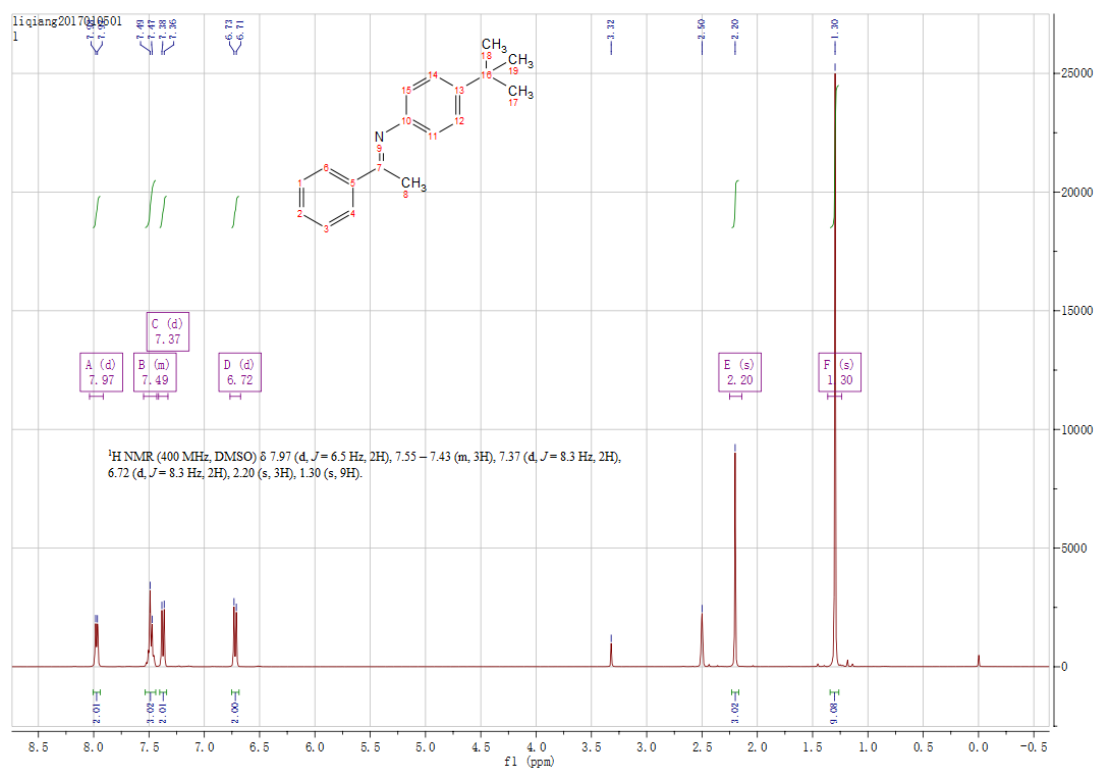



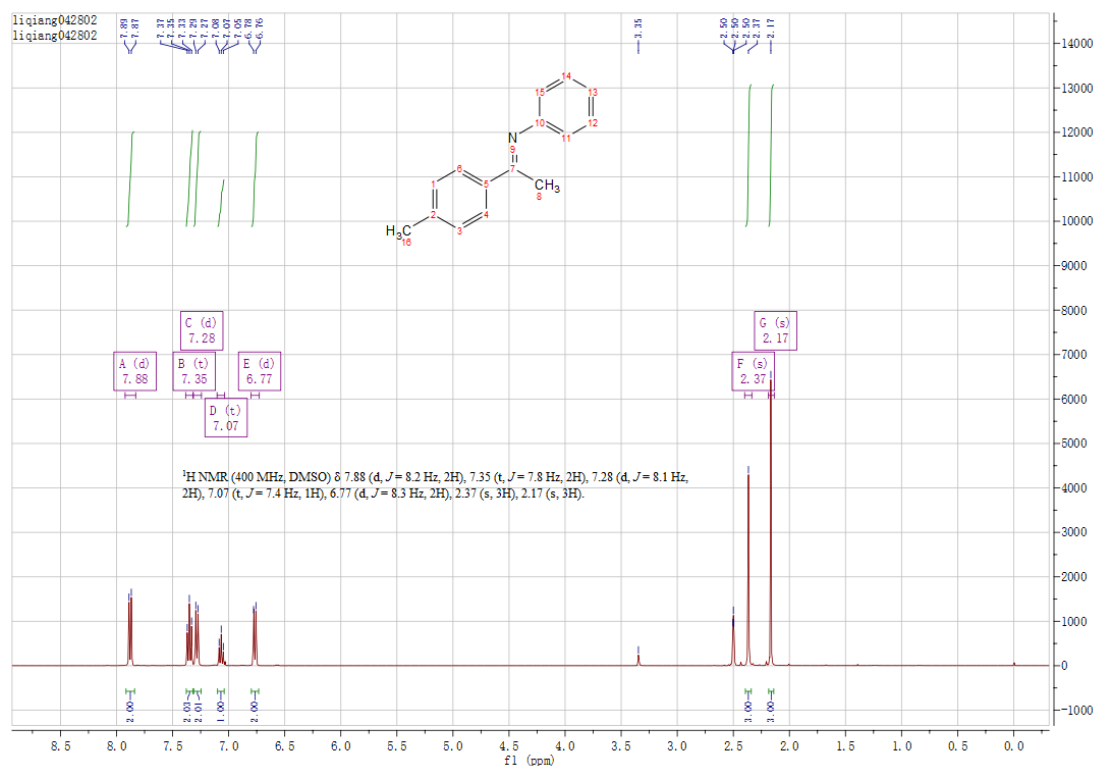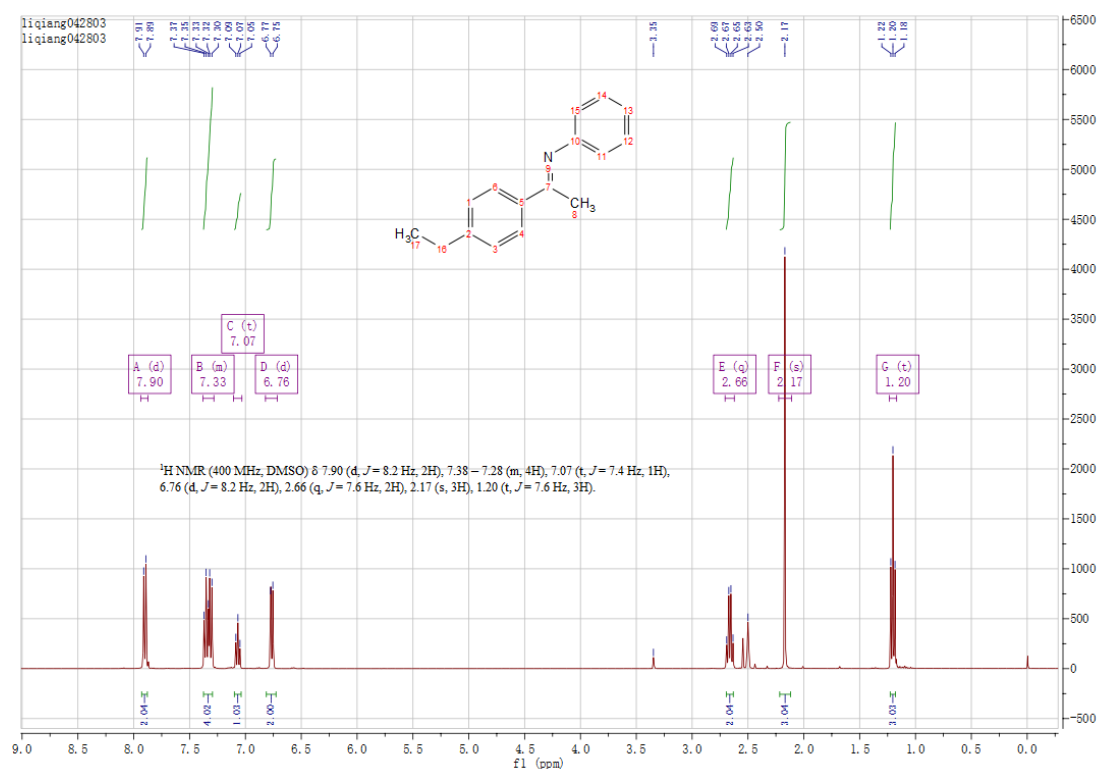

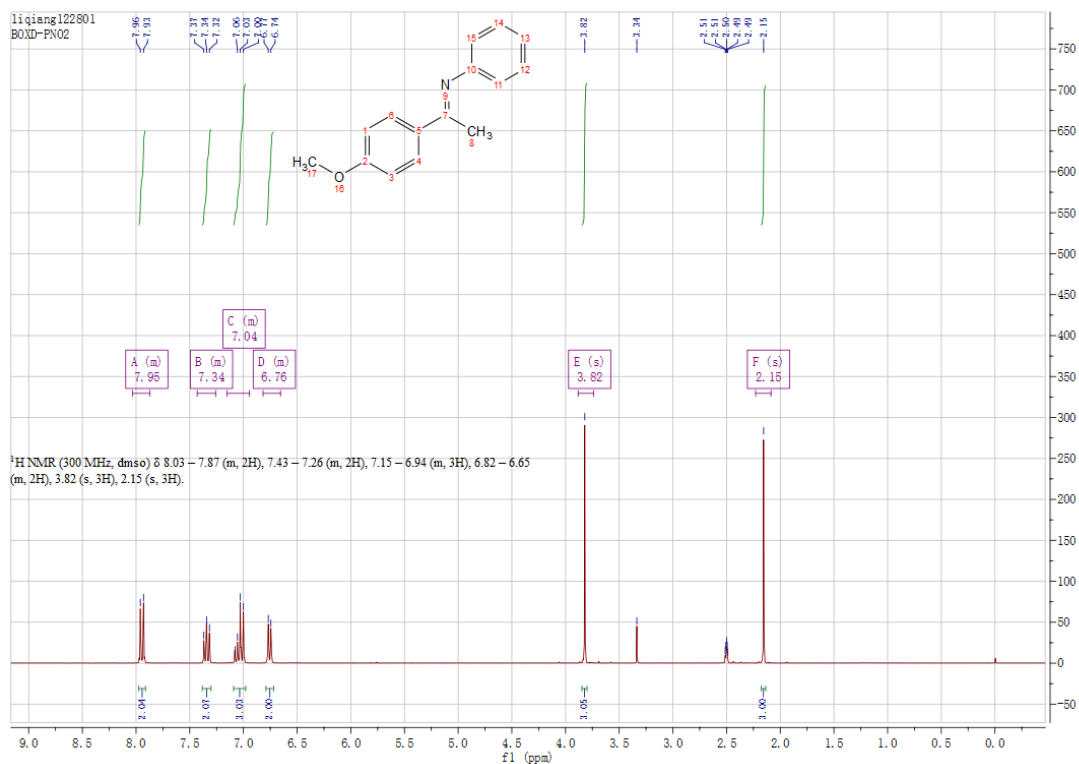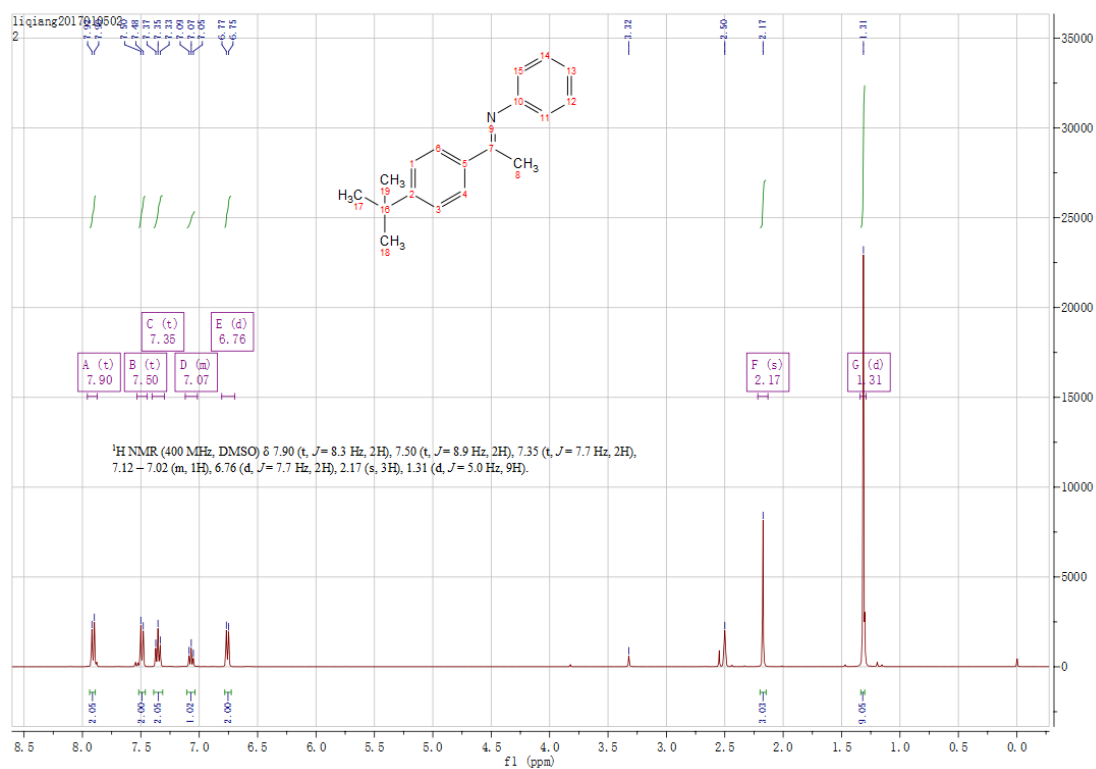

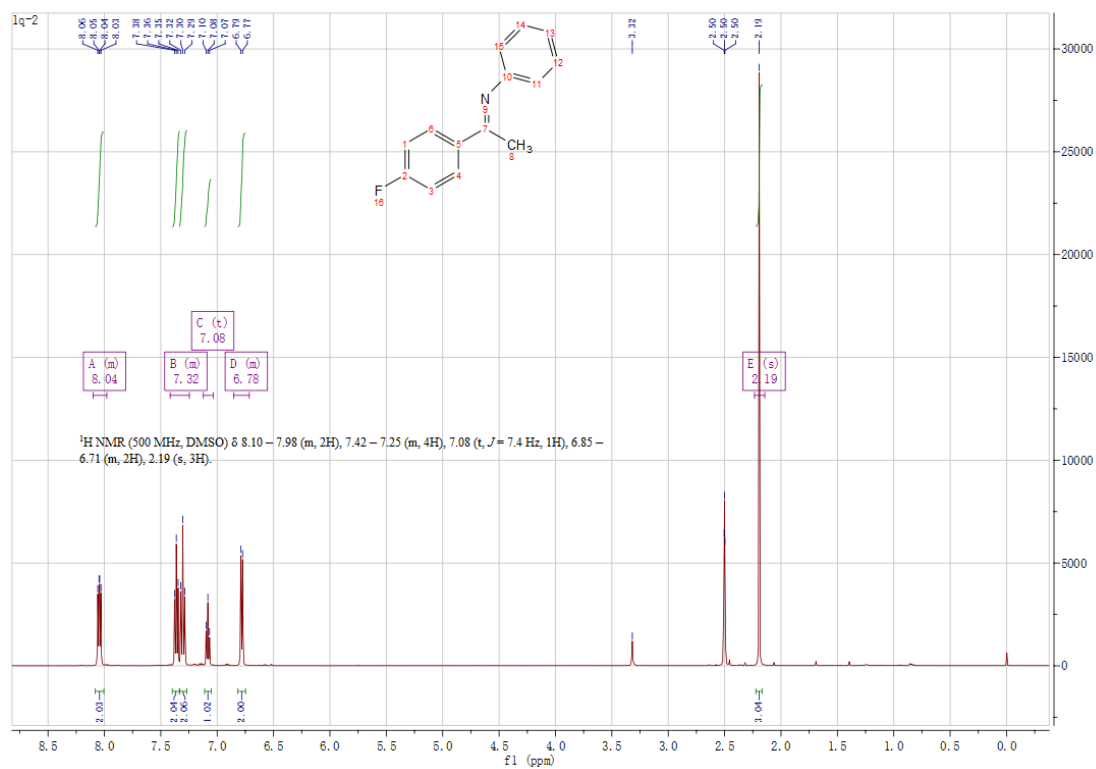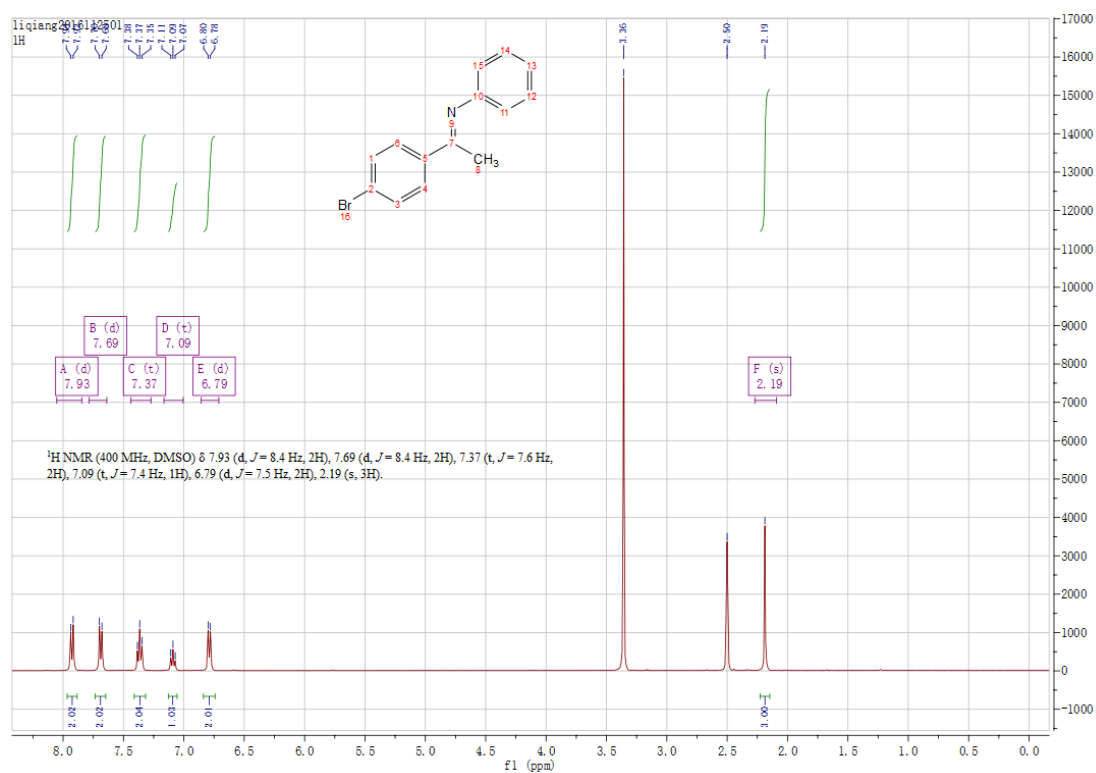

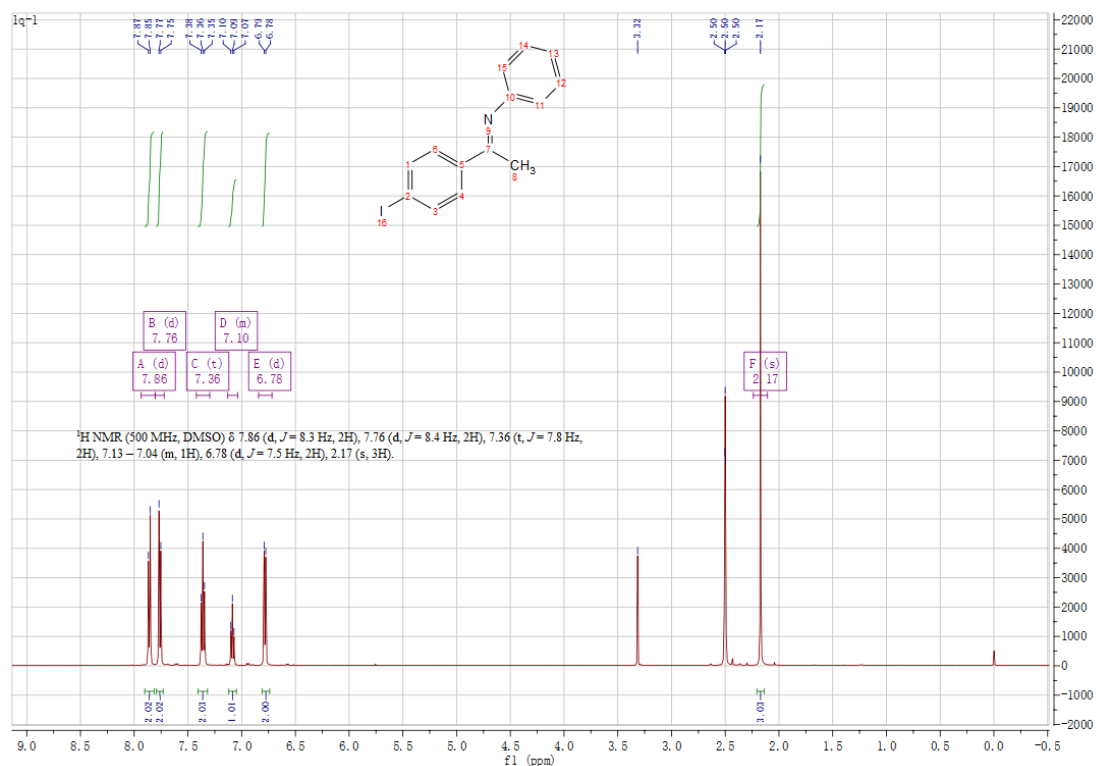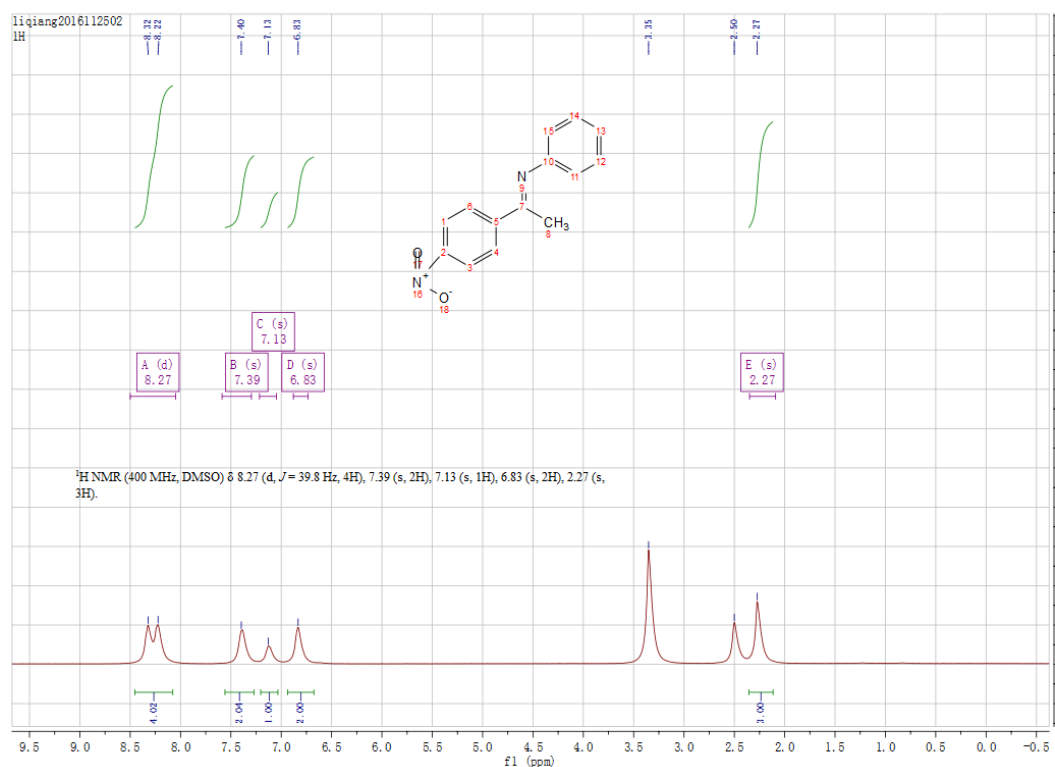

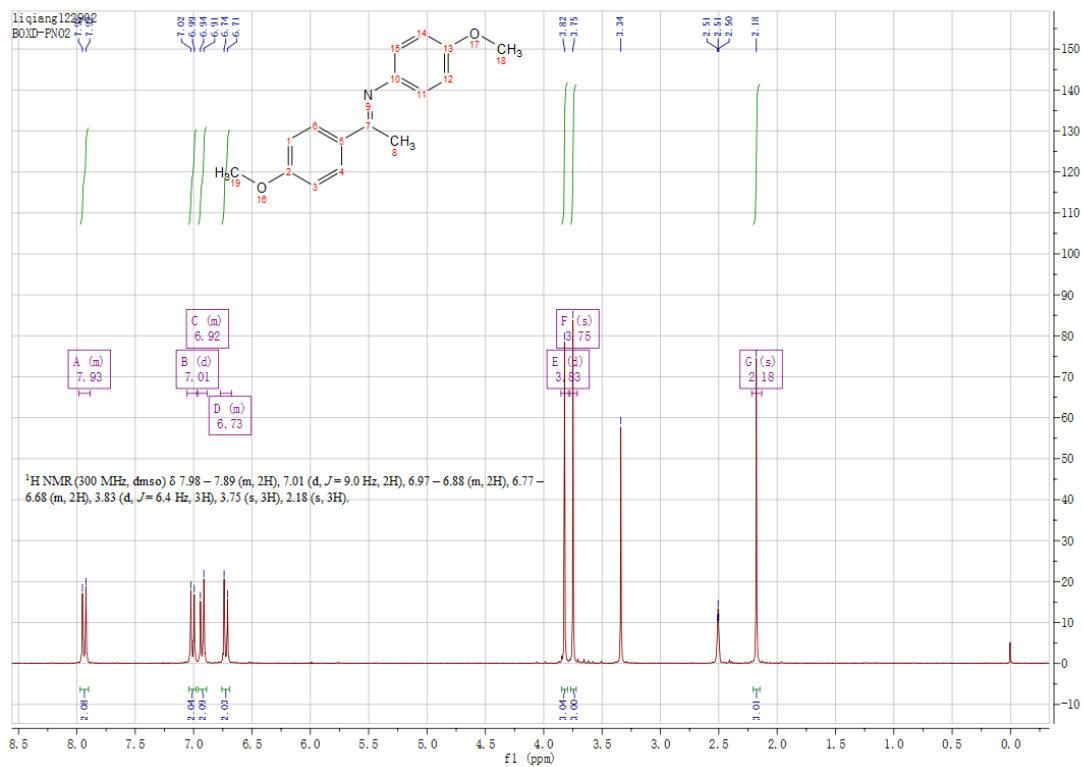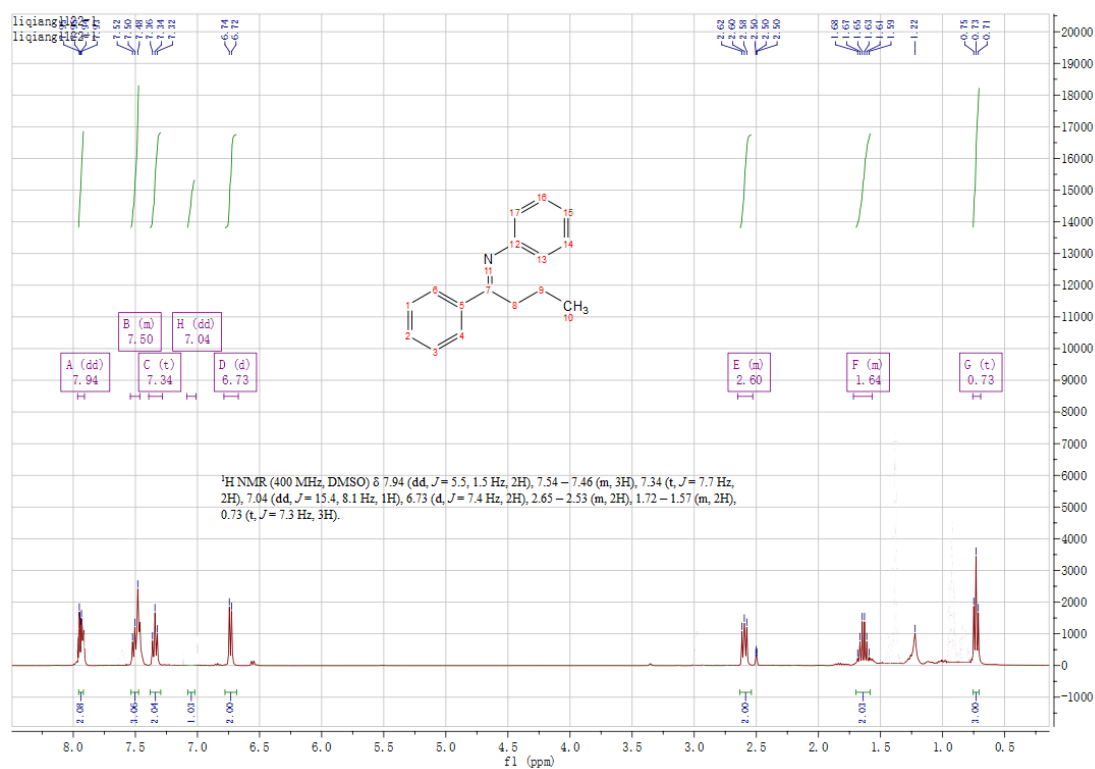

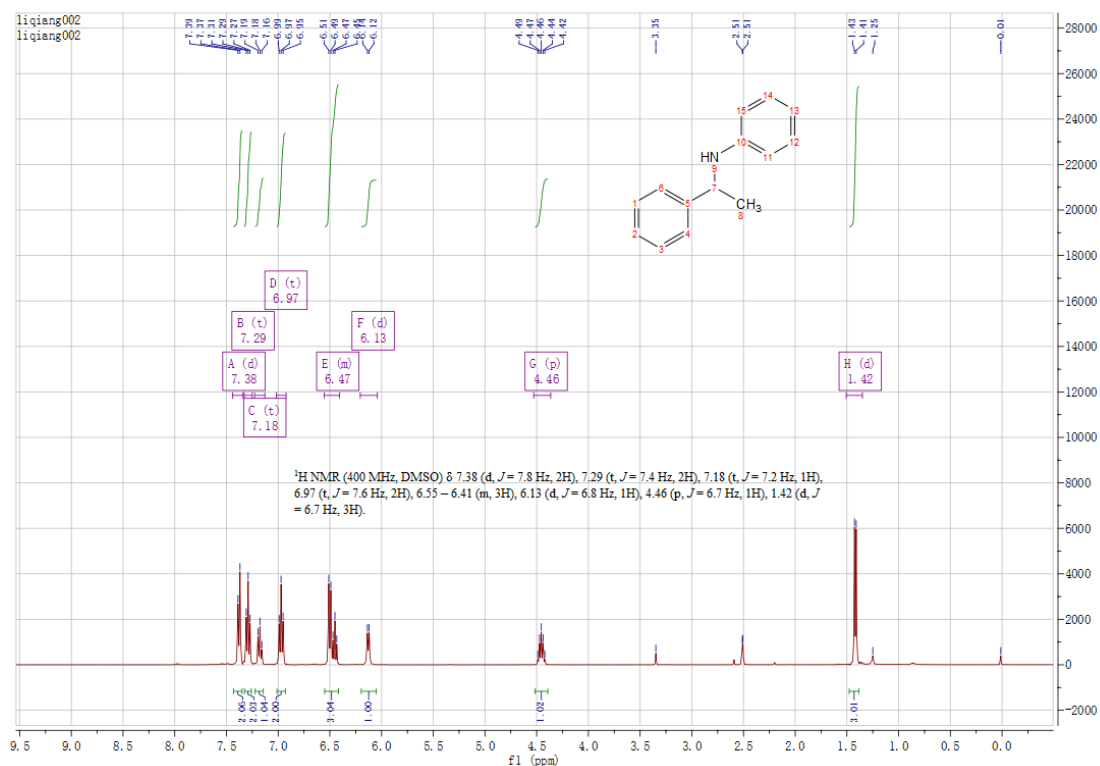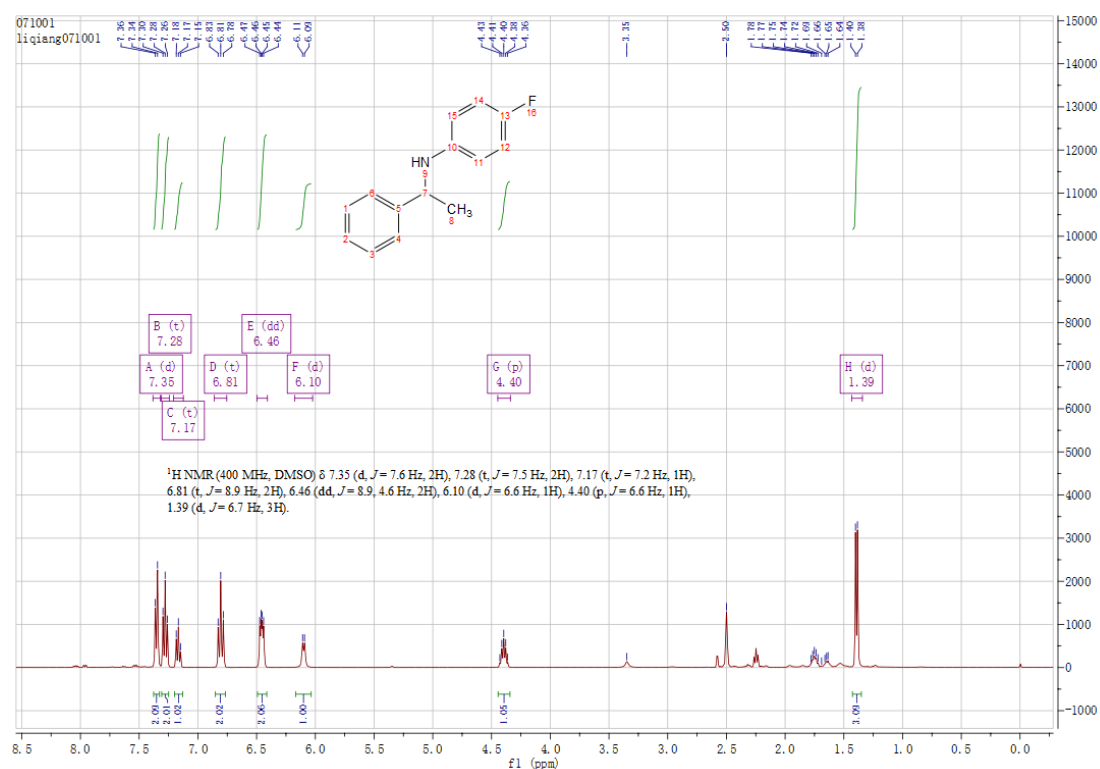



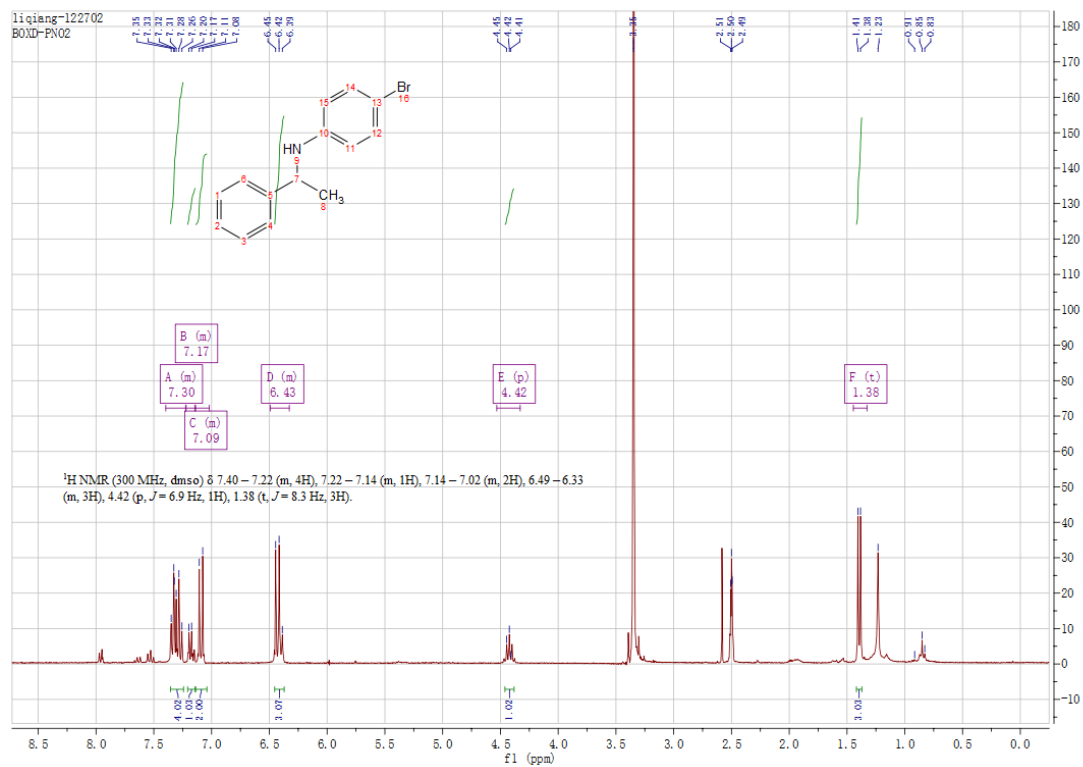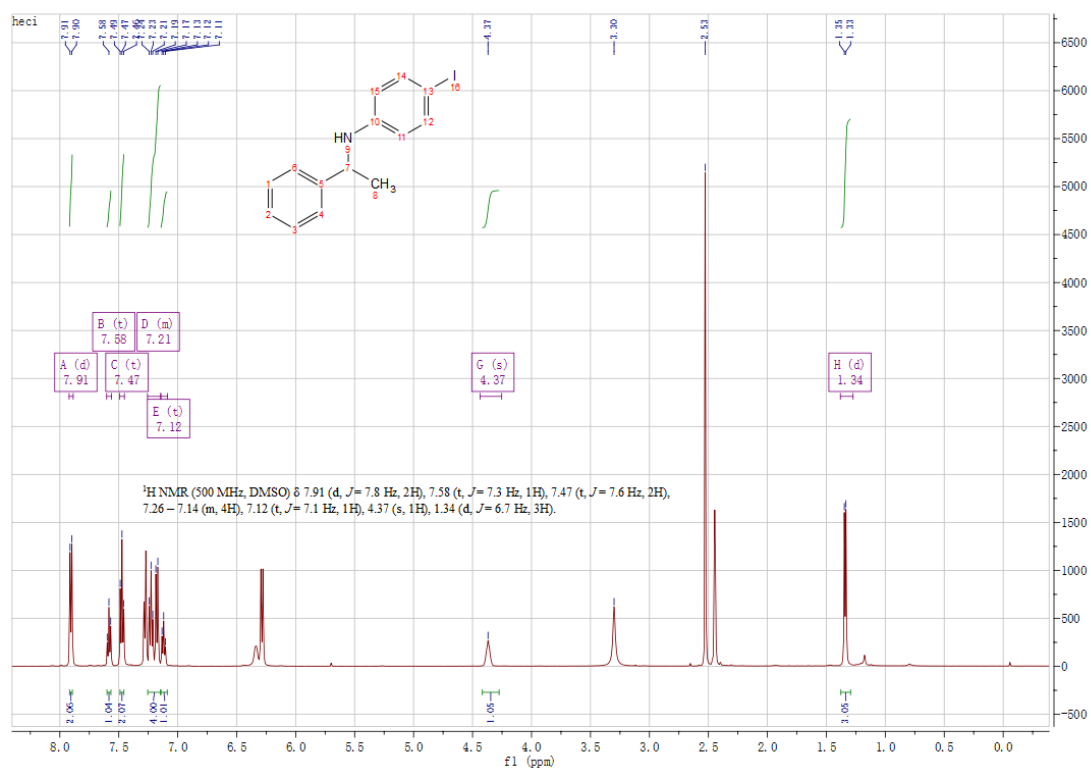

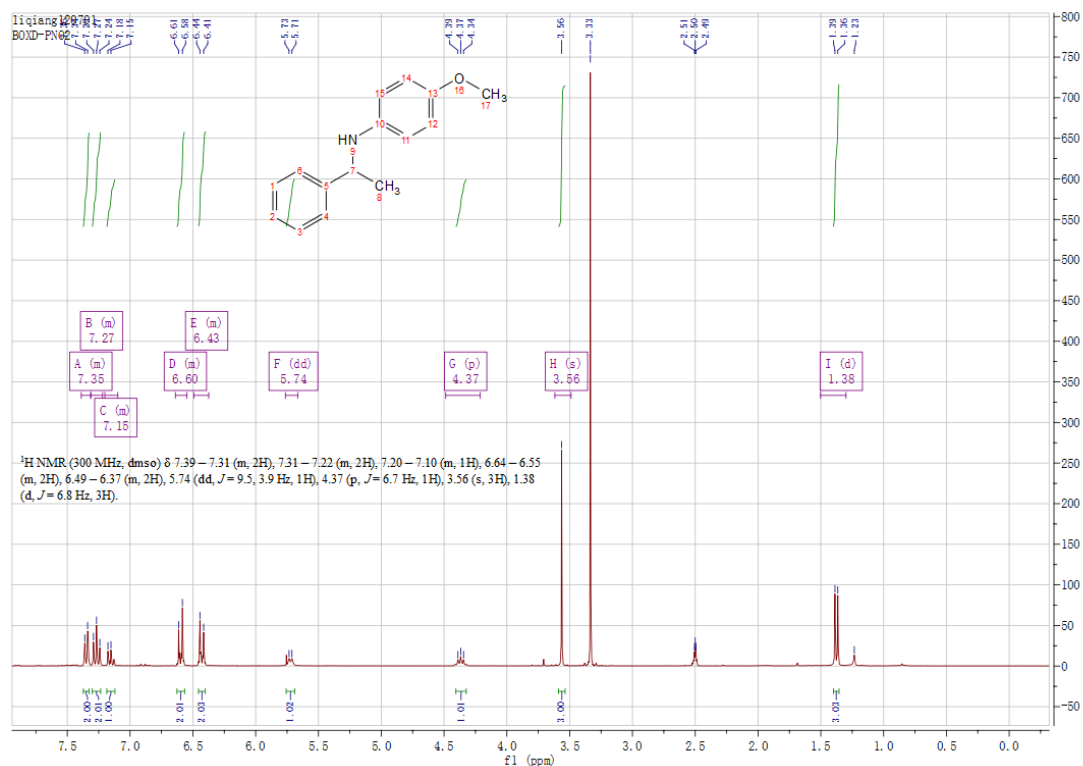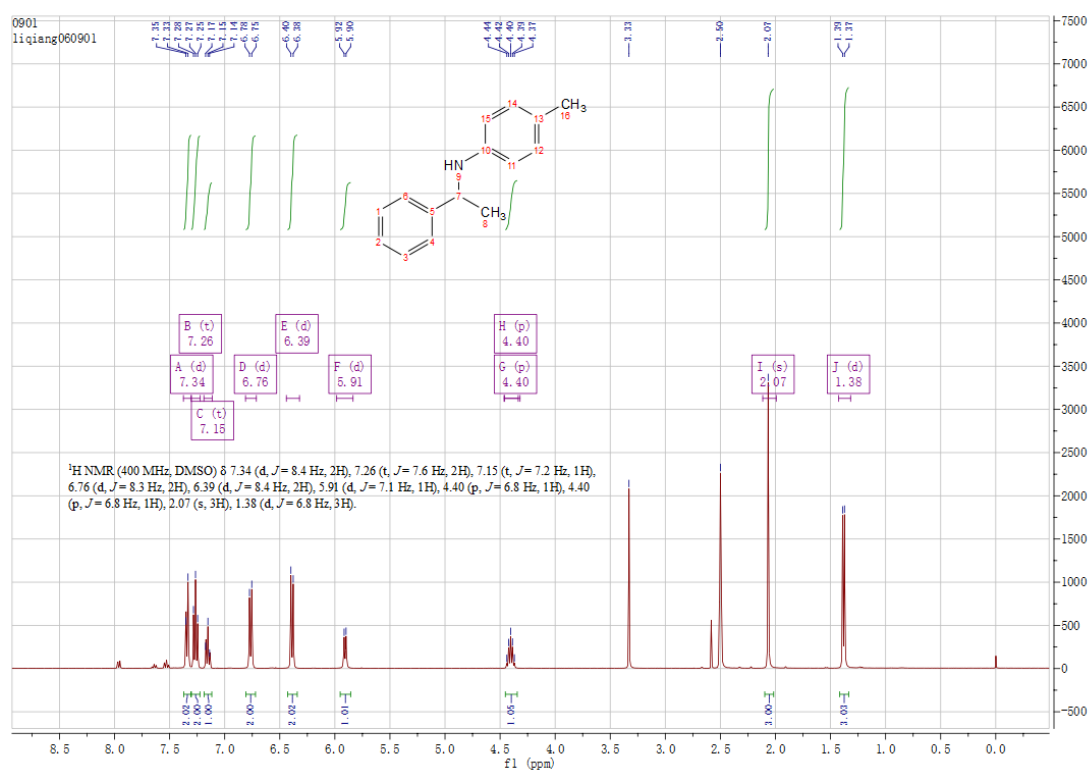

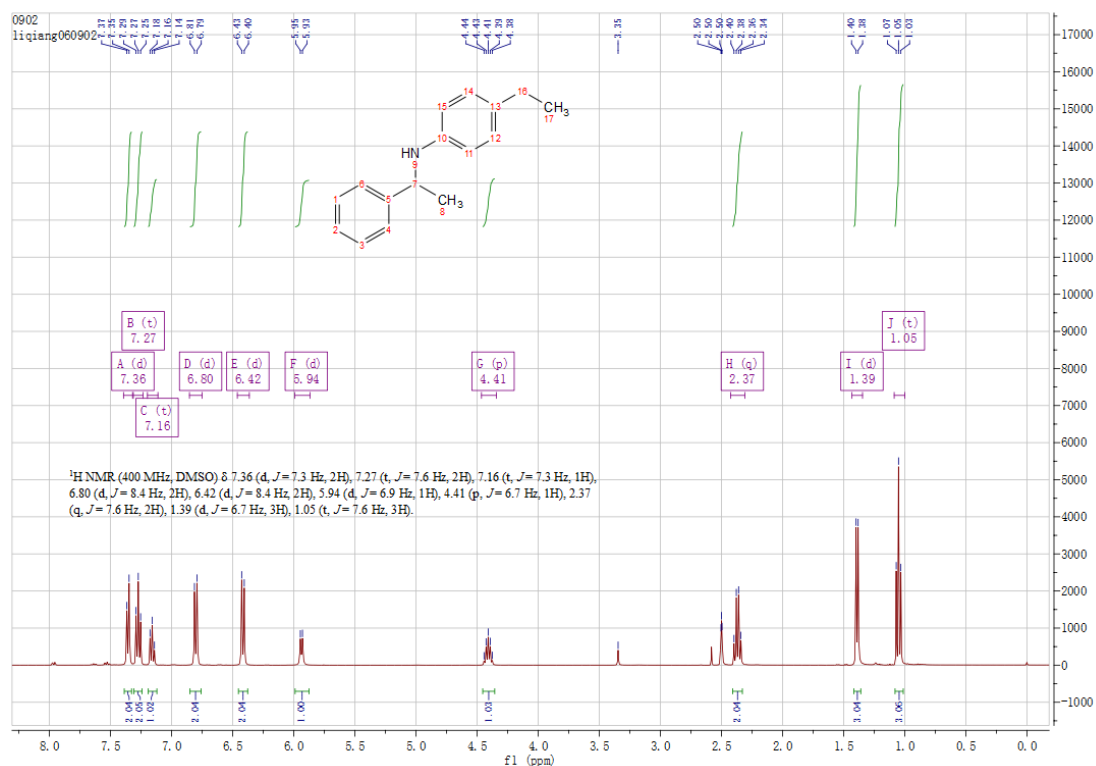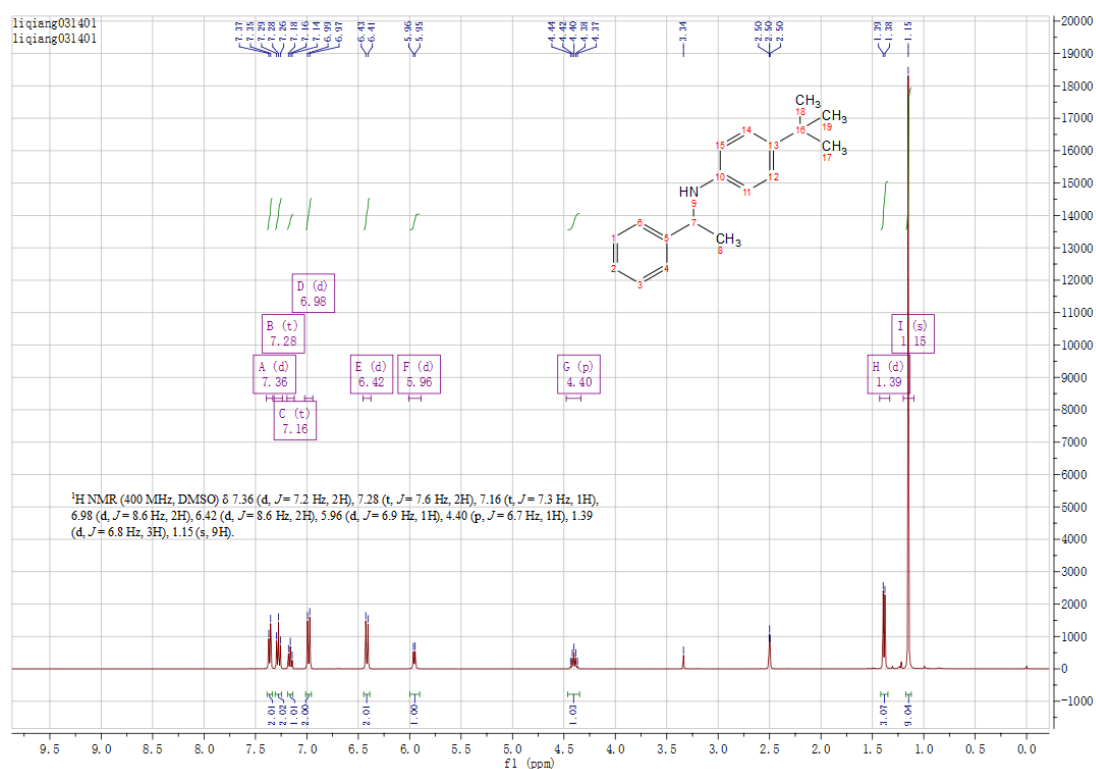

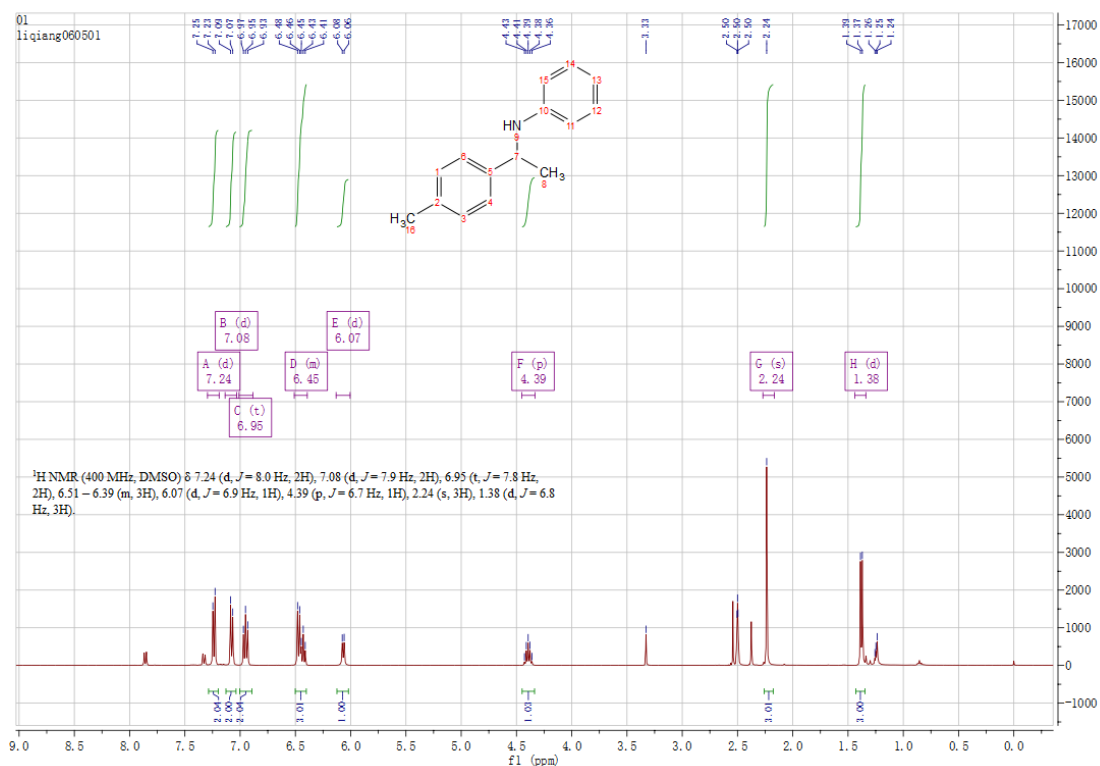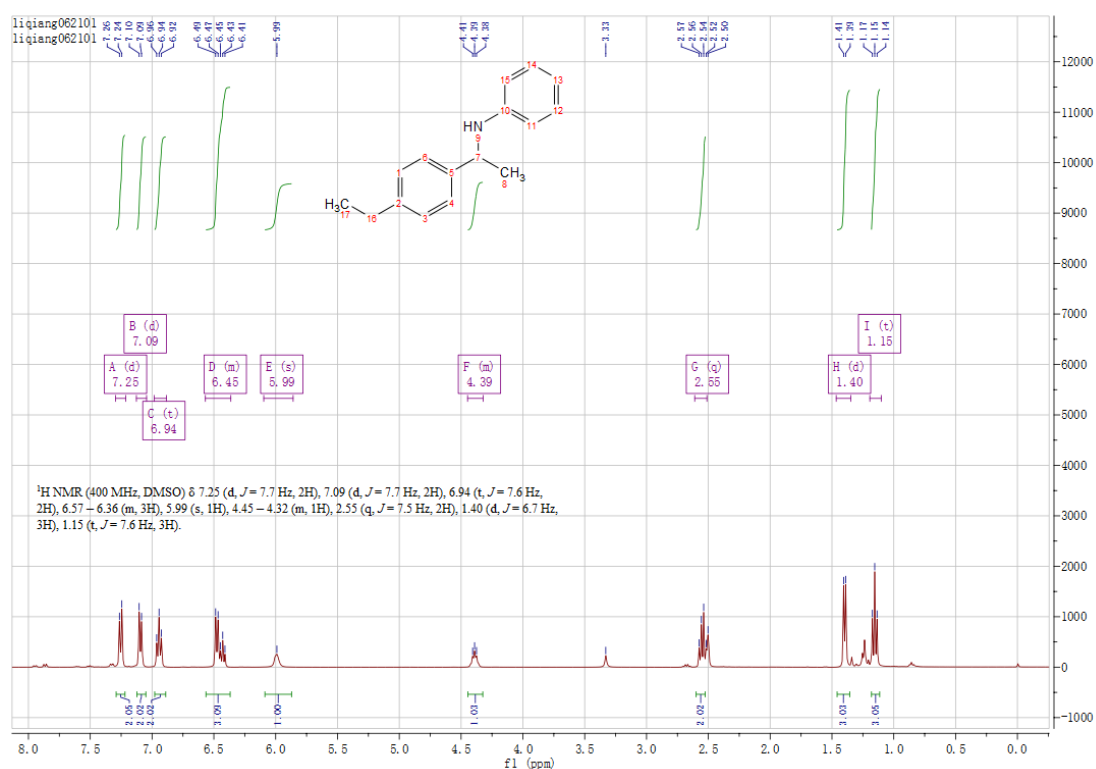



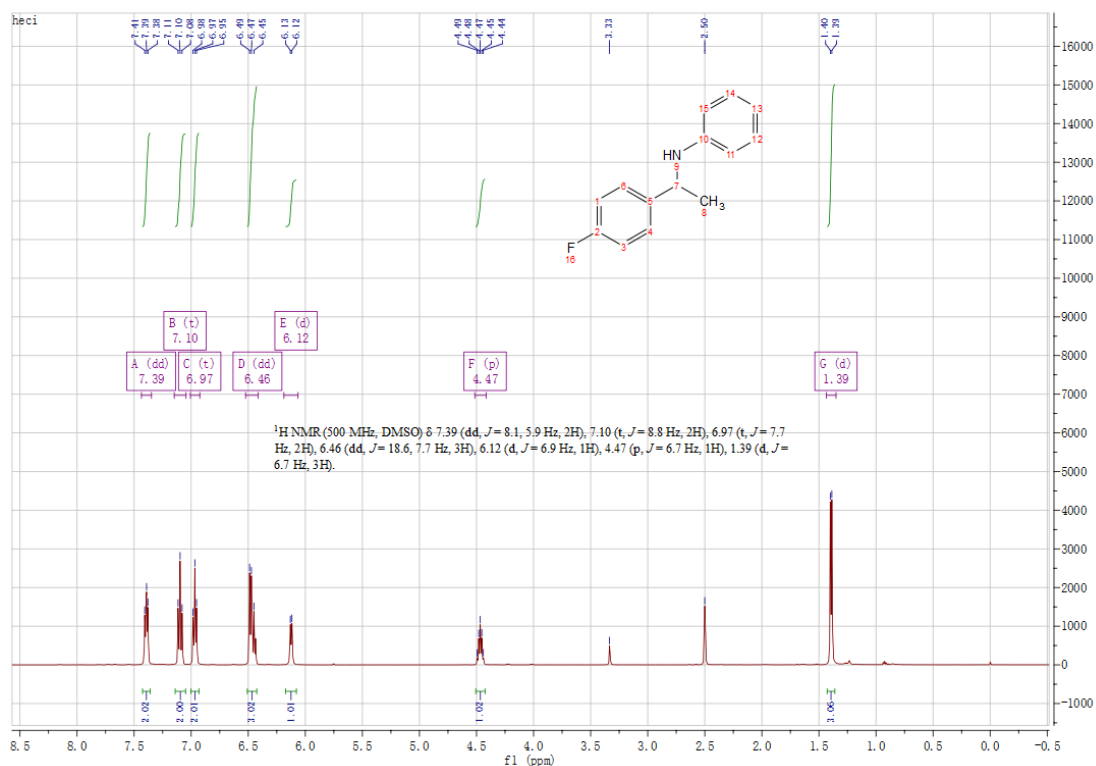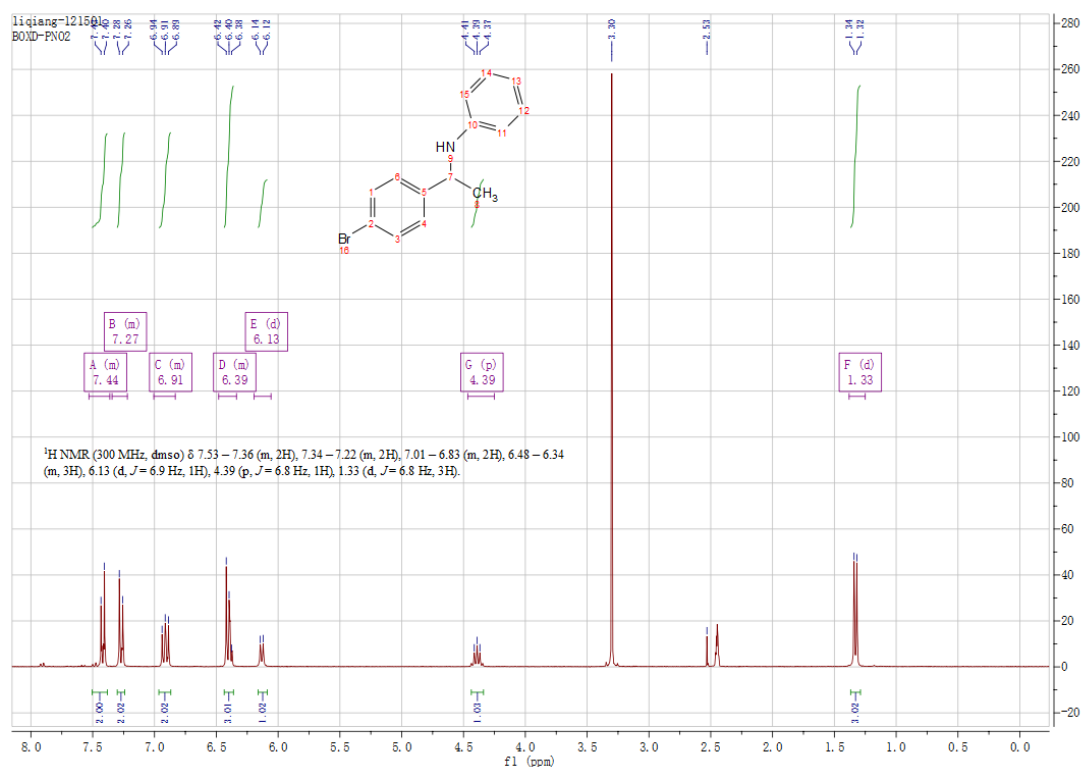

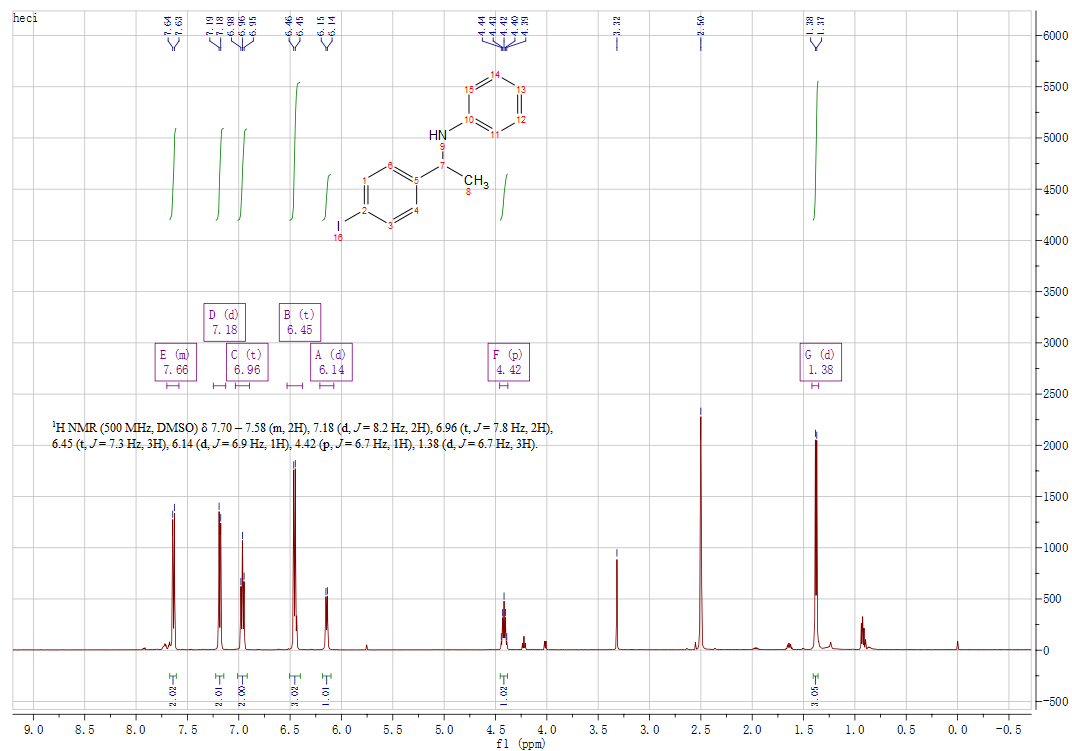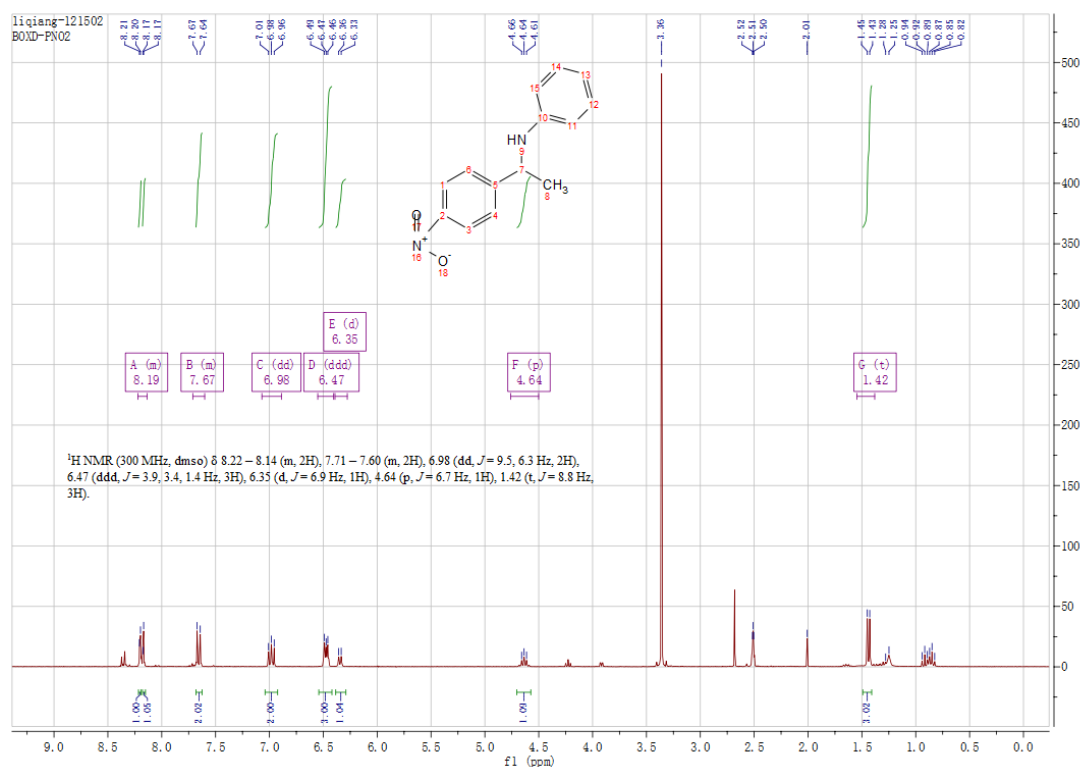

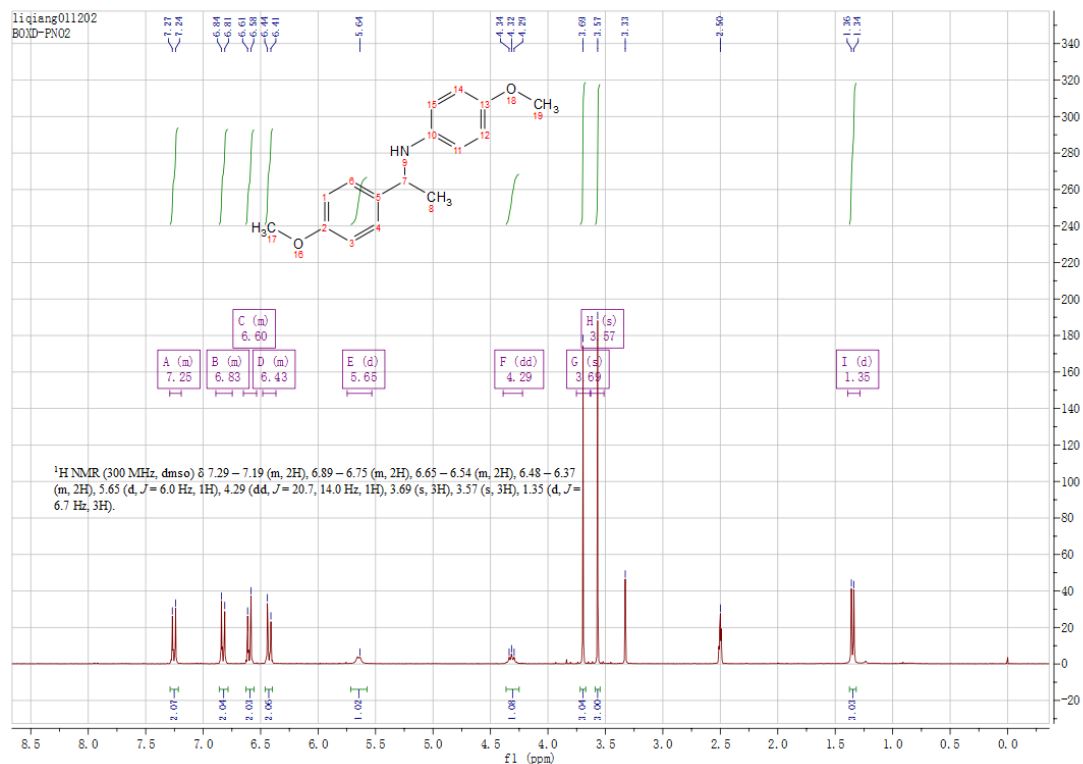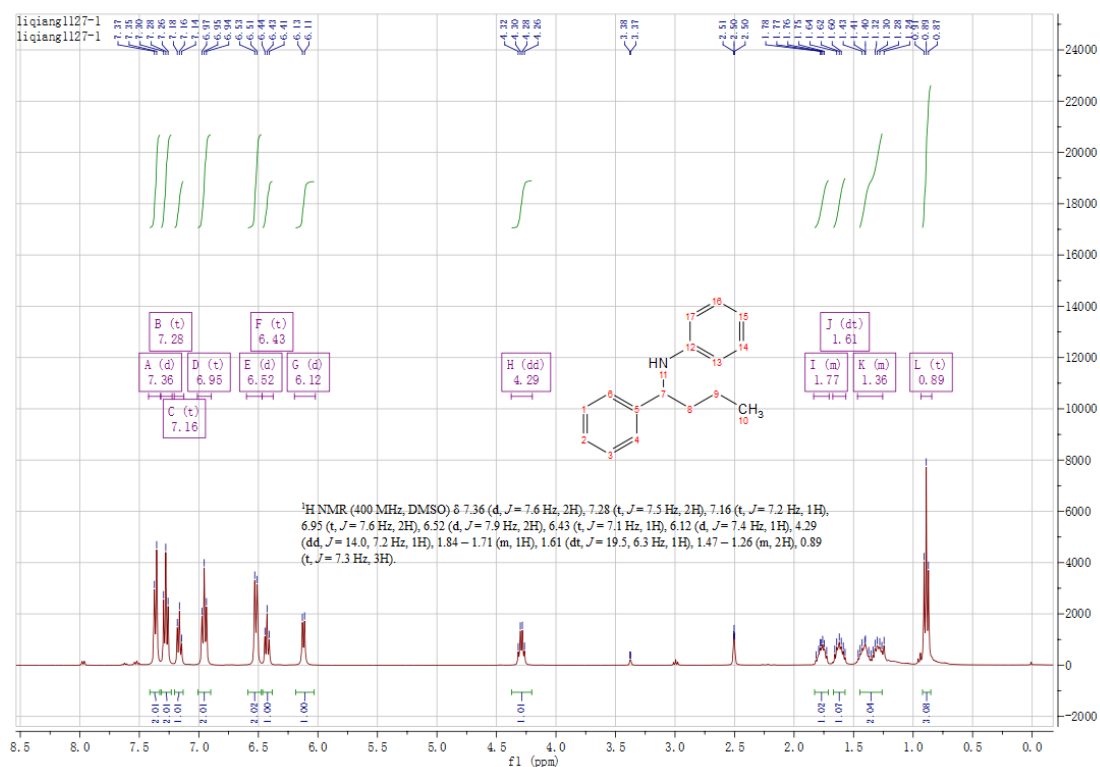

Supplement: c7nj03912c2.pdf [file c7nj03912c2.pdf]
